# Supplementary material for: Gut microbiota-mediated secondary bile acid alleviates Staphylococcus aureus-induced mastitis through the TGR5-cAMP-PKA-NF-κB/NLRP3 pathways in mice
Source: PubMed Central journal article supplement (PMC9908919; doi:10.1038/s41522-023-00374-8), 2023-02-08
Supplement: 41522_2023_374_MOESM1_ESM.pdf [file 41522_2023_374_MOESM1_ESM.pdf]

1 **Supplementary materials for**

2 **Gut microbiota-mediated secondary bile acid alleviates *Staphylococcus aureus*-induced**  
3 **mastitis through the TGR5-cAMP-PKA-NF- $\kappa$ B/NLRP3 pathways in mice**

4

5 Caijun Zhao<sup>1#</sup>, Keyi Wu<sup>1#</sup>, Haoyang Hao<sup>1</sup>, Yihong Zhao<sup>1</sup>, Lijuan Bao<sup>1</sup>, Min Qiu<sup>1</sup>, Yuhong He<sup>1</sup>,

6 Zhaoqi He<sup>1</sup>, Naisheng Zhang<sup>1</sup>, Xiaoyu Hu<sup>1\*</sup>, Yunhe Fu<sup>1\*</sup>

7 1. Department of Clinical Veterinary Medicine, College of Veterinary Medicine, Jilin University,

8 Changchun, Jilin Province 130062, China.

9

10 # Authors contributed equally to this study.

11

12 \* **Corresponding author:**

13 Yunhe Fu, E-mail: fuyunhesky@sina.com.

14 Xiaoyu Hu, E-mail: hxiaoyu@yeah.net.

15

16

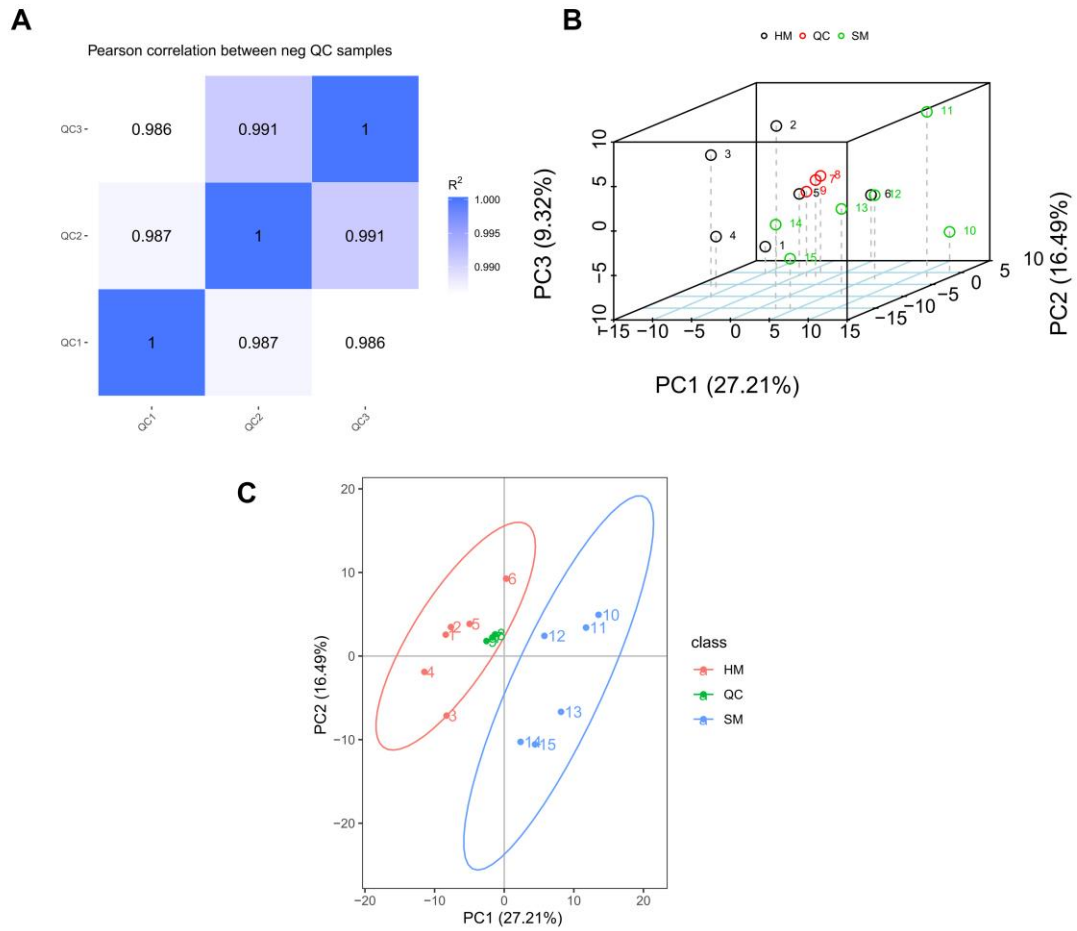

17

18 **Supplementary Figure 1. Data quality checks. A.** The Pearson correlation of milk QC samples.

19 **B-C.** The PCA score plots for the healthy and SARA samples containing QC samples. QC, quality

20 control; Principal component analysis, PCA

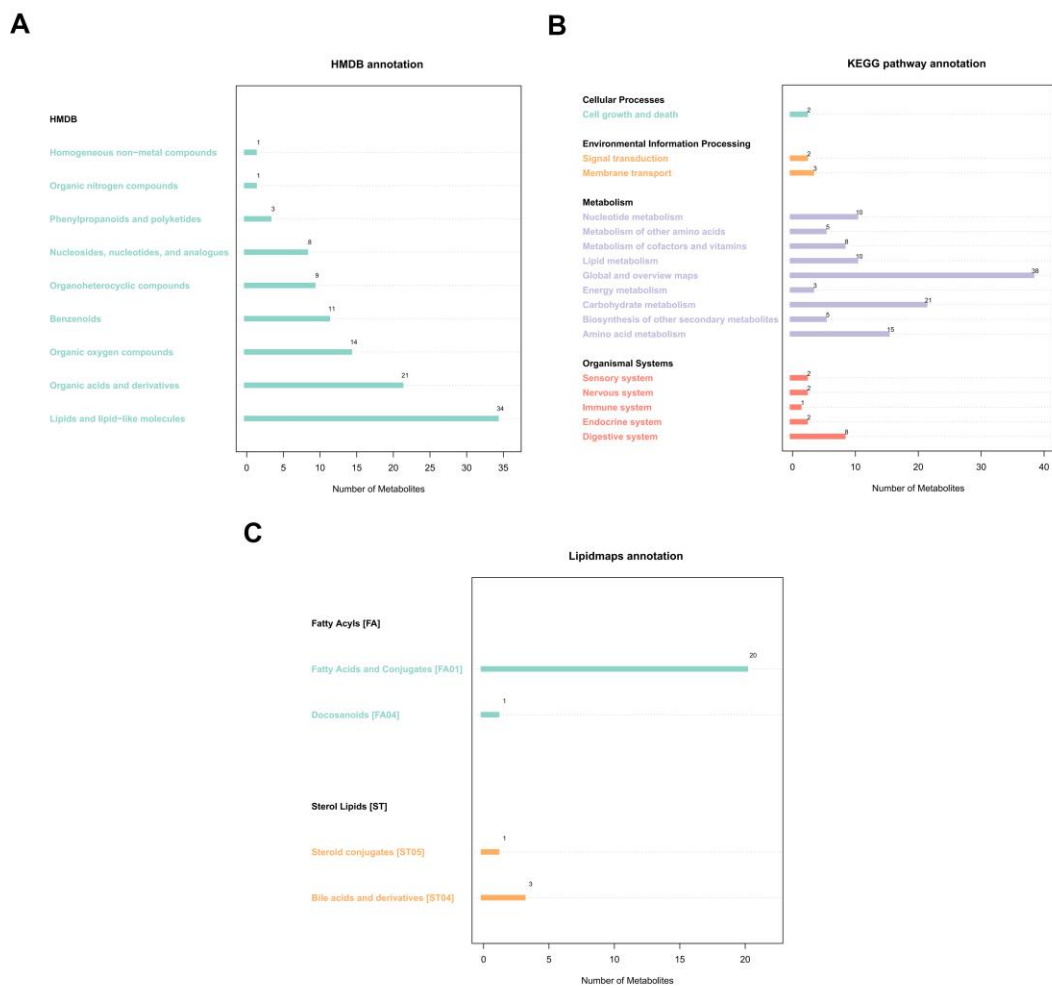

21

22 **Supplementary Figure 2. Classification and functional annotation of metabolites. A.** HMDB  
 23 classification annotation. **B.** KEGG pathway annotation for the healthy and SARA milk samples.  
 24 **C.** Lipid maps annotation for the healthy and SARA samples. HMDB, Human Metabolome  
 25 Database; KEGG, Kyoto Encyclopedia of Genes and Genomes.

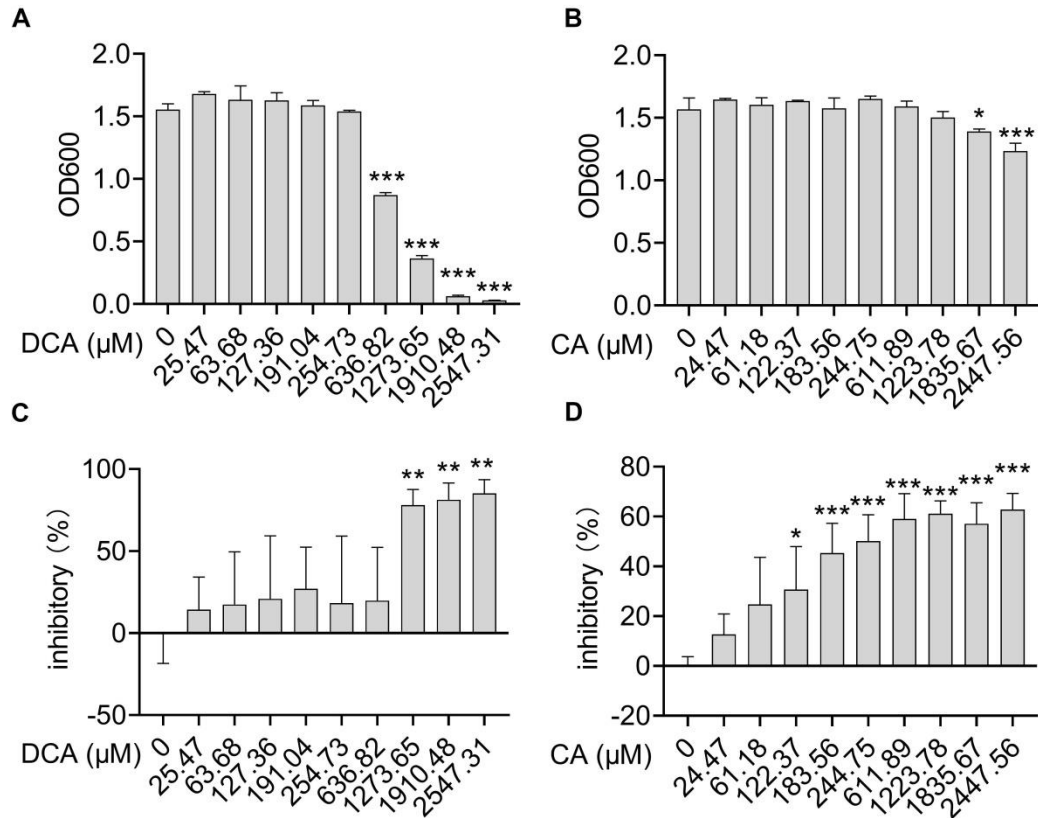

26

27 **Supplementary Figure 3. The effects of DCA and CA on *S. aureus* growth and biofilm**  
 28 **formation. A-B.** *S. aureus* was cultured in a TSB supplemented with different concentration of  
 29 DCA or CA for 24 h and measured at OD 600 nm. **C-D.** *S. aureus* was cultured in a TSB  
 30 supplemented with different concentration of DCA or CA for 24 h without shaking. The biofilm  
 31 was detected at OD 570 nm after crystal violet staining. Data are expressed as the means ± SD  
 32 (A-D). \* $p < 0.05$ , \*\* $p < 0.01$ , \*\*\* $p < 0.001$  indicate significance by Student's t-test.

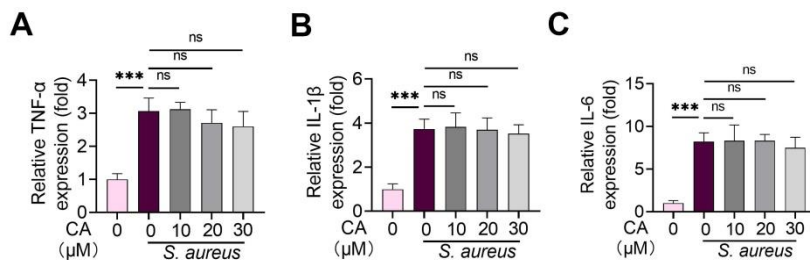

33

34 **Supplementary Figure 4. CA does not alleviate *S. aureus*-induced inflammatory response in**  
 35 **MMECs.** Cells were pretreated with CA (10, 20 and 30 μM) for 2 h followed by *S. aureus*  
 36 treatment for next 24 h, and the relative mRNA levels of proinflammatory TNF-α (A), IL-1β (B)  
 37 and IL-6 (C) from the indicated group were detected by qPCR. Data are expressed as the means ±

38 SD (A-C) and one-way ANOVA followed by Tukey's test (A-C) was performed. \*\*\* $p < 0.001$   
 39 indicates significance. ns, no significance.  
 40

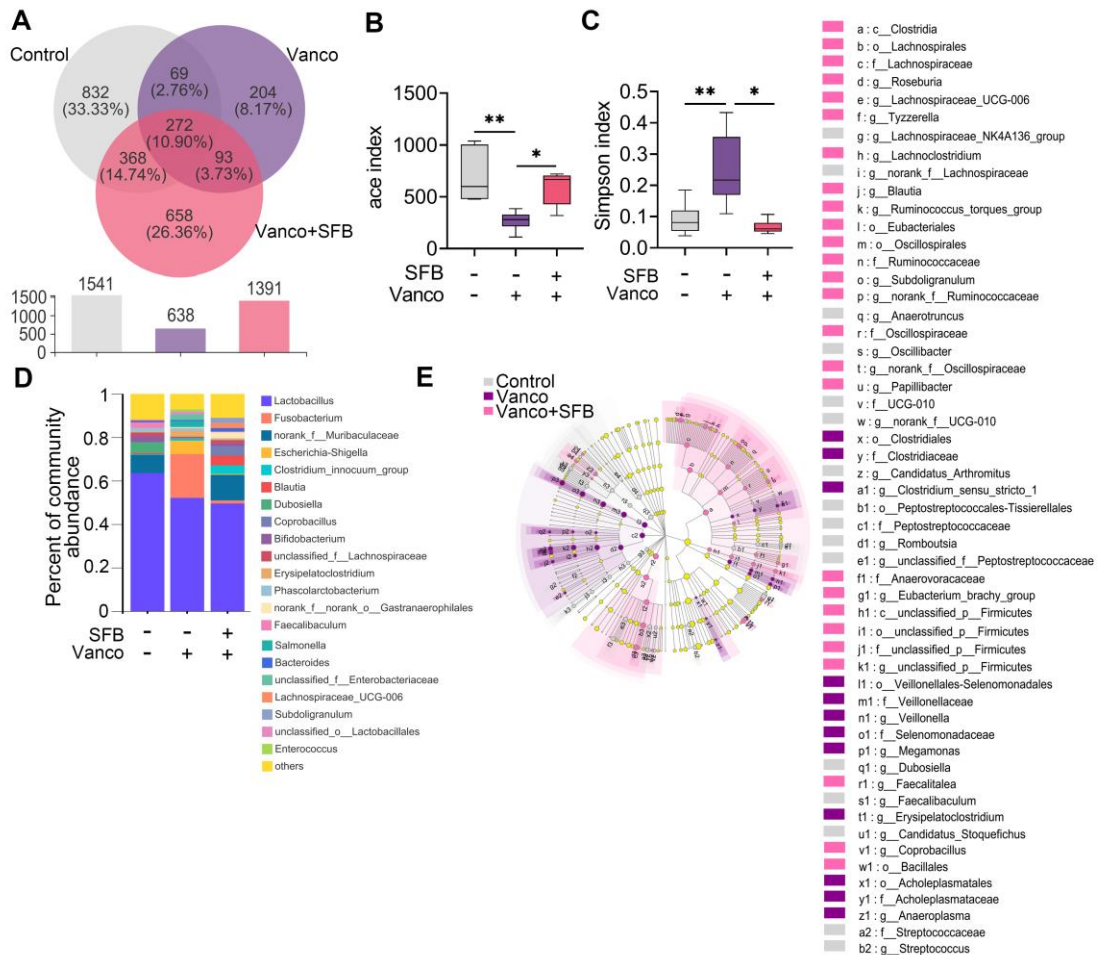

41  
 42 **Supplementary Figure 5. The gut microbiota profiles after vancomycin treatment and SFB**  
 43 **transplantation. A.** Venn diagram from the indicated groups. **B-C.** Alpha diversity analysis by  
 44 ace and Simpson indices. **D.** Gut microbial compositions at the genus level from the indicated  
 45 groups. **E.** LefSe showed different taxa that enriched in the indicated groups. Data are expressed  
 46 as boxplots, with the center line representing the median, the boundary of the whiskers  
 47 representing the minimum and maximum values of the dataset, and the boundary of the box  
 48 representing the 25th and 75th percentile of the dataset (**B-C**) and one-way ANOVA followed by  
 49 Tukey's test (**B-C**) was performed. \* $p < 0.05$  and \*\* $p < 0.01$  indicate significance.

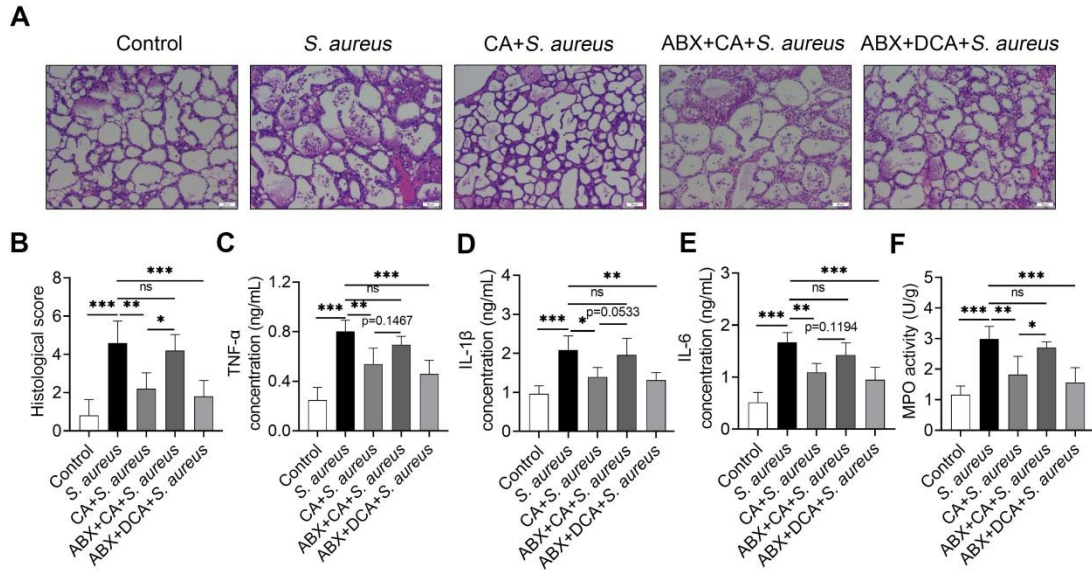

50  
 51 **Supplementary Figure 6. Gut microbiota-mediated DCA production alleviates *S.***  
 52 ***aureus*-induced mastitis in mice.** Mice were treated with CA (30 mg/kg) or DCA (30 mg/kg) for  
 53 a week with or without antibiotics treatment, followed by *S. aureus*-induced mastitis. **A.**  
 54 Representative H&E-stained sections of the mammary gland from the indicated groups (scale bar,  
 55 50 μm). **B.** Histological score for the mammary gland based on H&E-stained sections (n=6).  
 56 Inflammatory parameters of the mammary gland from different groups, including TNF-α (**C**),  
 57 IL-1β (**D**) and IL-6 (**E**) concentrations and MPO activity (**F**), were performed (n=6). Data are  
 58 expressed as the means ± SD (**B-F**) and one-way ANOVA was performed, followed by Tukey's  
 59 test (**B-F**). \* $p < 0.05$ , \*\* $p < 0.01$ , \*\*\* $p < 0.001$  indicate significance. ns, no significance.

60  
 61 **Supplementary Table 1. Identified number of differential metabolites in Health and SARA**  
 62 **samples.**

| Compared Sample   | Number of total identified | Number of total significant | Number of significant Up | Number of significant Down |
|-------------------|----------------------------|-----------------------------|--------------------------|----------------------------|
| SARA. vs. Healthy | 213                        | 44                          | 5                        | 39                         |

63  
 64 **Supplementary Table 2. Metabolites significantly upregulated in SARA cows and ranked**  
 65 **according to the P-value**

| Name                                                           | Formul a | FC    | log2F C | Pvalu e | VIP   |
|----------------------------------------------------------------|----------|-------|---------|---------|-------|
| 1-methyl-N-(3-methyl-5-cinnolinyl)-1H-imidazol e-4-sulfonamide | C13      | 3.325 | 1.733   | 0.028   | 1.768 |
|                                                                | H13 N5   | 244   | 46      | 923     | 183   |

|                                                                 |                      |              |              |              |              |
|-----------------------------------------------------------------|----------------------|--------------|--------------|--------------|--------------|
|                                                                 | O2 S                 |              |              |              |              |
| 3-(methylsulfanyl)-5H-[1,2,4]triazino[5,6-b]indole              | C10 H8<br>N4 S       | 4.365<br>467 | 2.126<br>136 | 0.013<br>204 | 3.064<br>469 |
| Cinnamoylglycine                                                | C11<br>H11 N<br>O3   | 2.173<br>313 | 1.119<br>896 | 0.004<br>915 | 1.270<br>383 |
| Epinephrine                                                     | C9 H13<br>N O3       | 3.231<br>945 | 1.692<br>403 | 4.10E-<br>07 | 1.872<br>821 |
| N-(1,1-Dioxotetrahydro-1H-1λ6-thiophen-3-yl)-4-methoxybenzamide | C12<br>H15 N<br>O4 S | 9.397<br>567 | 3.232<br>287 | 3.13E-<br>07 | 3.506<br>554 |

66 FC, fold change; VIP, variable importance in the projection

67

68 **Supplementary Table 3. Metabolites significantly downregulated in SARA cows and ranked**  
69 **according to the P-value**

| Name                        | Formula            | FC           | log2FC       | Pvalue       | VIP          |
|-----------------------------|--------------------|--------------|--------------|--------------|--------------|
| LPE 14:0                    | C19 H40 N<br>O7 P  | 0.50811<br>5 | -0.9767<br>7 | 0.03993<br>2 | 1.19383<br>5 |
| SM (d14:1/14:0)             | C33 H67<br>N2 O6 P | 0.20185<br>8 | -2.3085<br>9 | 0.03487<br>1 | 1.77633      |
| Cholic acid                 | C24 H40<br>O5      | 0.12203<br>5 | -3.0346<br>4 | 0.03283<br>6 | 2.19600<br>8 |
| Deoxycholic acid            | C24 H40<br>O4      | 0.27184<br>8 | -1.8791<br>3 | 0.03193<br>1 | 1.68554<br>9 |
| FAHFA (18:1/20:3)           | C38 H66<br>O4      | 0.56169<br>6 | -0.8321<br>4 | 0.02073<br>7 | 1.01958<br>8 |
| FAHFA (18:1/18:2)           | C36 H64<br>O4      | 0.53339<br>7 | -0.9067<br>2 | 0.01256<br>8 | 1.00469<br>4 |
| PS (18:0/22:4)              | C46 H82 N<br>O10 P | 0.37562      | -1.4126<br>5 | 0.01157<br>8 | 1.77248      |
| FAHFA (18:1/19:2)           | C37 H66<br>O4      | 0.51183<br>9 | -0.9662<br>4 | 0.01079<br>8 | 1.21477<br>7 |
| (R)-3-Hydroxy myristic acid | C14 H28<br>O3      | 0.35062<br>2 | -1.5120<br>1 | 0.01054<br>7 | 1.88635<br>8 |
| LPG 18:1                    | C24 H47<br>O9 P    | 0.47780<br>9 | -1.0654<br>9 | 0.01033<br>1 | 1.25172<br>6 |
| Eicosapentaenoic acid       | C20 H30<br>O2      | 0.49815<br>5 | -1.0053<br>3 | 0.00860<br>1 | 1.06136<br>5 |
| LPE 22:4                    | C27 H48 N<br>O7 P  | 0.39868<br>6 | -1.3266<br>7 | 0.00402<br>1 | 1.36796<br>6 |
| cis-2-Decenoic acid         | C10 H18<br>O2      | 0.31500<br>8 | -1.6665<br>4 | 0.00175      | 1.84329<br>3 |
| Heptanoic acid              | C7 H14 O2          | 0.30468<br>5 | -1.7146<br>1 | 0.00171<br>8 | 1.77304<br>5 |

|                                            |                   |              |              |              |              |
|--------------------------------------------|-------------------|--------------|--------------|--------------|--------------|
| $\alpha$ -Linolenic acid                   | C18 H30<br>O2     | 0.46655<br>3 | -1.0998<br>9 | 0.00120<br>2 | 1.19371<br>3 |
| $\gamma$ -Linolenic acid                   | C18 H30<br>O2     | 0.46681<br>2 | -1.0990<br>9 | 0.00118<br>7 | 1.19271<br>7 |
| FAHFA (16:0/18:2)                          | C34 H62<br>O4     | 0.39321<br>2 | -1.3466<br>2 | 0.00110<br>1 | 1.51862<br>8 |
| LPS 22:4                                   | C28 H48 N<br>O9 P | 0.30965<br>6 | -1.6912<br>6 | 0.00103      | 1.75315<br>7 |
| Pentadecanoic acid                         | C15 H30<br>O2     | 0.43584<br>3 | -1.1981<br>2 | 0.00080<br>9 | 1.34573<br>7 |
| FAHFA (16:1/18:3)                          | C34 H58<br>O4     | 0.13839<br>8 | -2.8531<br>1 | 0.00052<br>9 | 3.18450<br>4 |
| Ethyl myristate                            | C16 H32<br>O2     | 0.51544      | -0.9561<br>2 | 0.00036<br>2 | 1.04839<br>8 |
| Adrenic acid                               | C22 H36<br>O2     | 0.24492<br>5 | -2.0295<br>9 | 0.00034<br>6 | 2.27353<br>3 |
| Hexanoic acid                              | C6 H12 O2         | 0.35958<br>2 | -1.4756<br>1 | 0.00034      | 1.63476<br>2 |
| FAHFA (18:2/18:2)                          | C36 H62<br>O4     | 0.21453<br>8 | -2.2207      | 0.00032<br>8 | 2.54354<br>6 |
| FAHFA (14:0/16:2)                          | C30 H54<br>O4     | 0.14979<br>4 | -2.7389<br>5 | 0.00028<br>4 | 3.07954<br>6 |
| 13-Hotre(R)                                | C18 H30<br>O3     | 0.46130<br>2 | -1.1162<br>2 | 0.00027<br>5 | 1.1945       |
| 16-Hydroxyhexadecanoic acid                | C16 H32<br>O3     | 0.33524<br>2 | -1.5767<br>2 | 0.00027      | 1.68989<br>4 |
| Tridecyclic acid                           | C13 H26<br>O2     | 0.26090<br>6 | -1.9384      | 0.00024<br>5 | 2.16590<br>1 |
| Arachidonic acid                           | C20 H32<br>O2     | 0.30289<br>3 | -1.7231<br>2 | 0.00021<br>6 | 1.81143<br>9 |
| FAHFA (18:2/20:4)                          | C38 H62<br>O4     | 0.11006<br>5 | -3.1835<br>7 | 0.00019<br>3 | 3.57878<br>5 |
| (+/-)12(13)-DiHOME                         | C18 H34<br>O4     | 0.31926<br>7 | -1.6471<br>7 | 0.00017<br>8 | 1.87584<br>6 |
| 11(Z),14(Z)-Eicosadienoic acid             | C20 H36<br>O2     | 0.39260<br>5 | -1.3488<br>5 | 0.00012<br>9 | 1.46567      |
| Lauric acid ethyl ester                    | C14 H28<br>O2     | 0.35603<br>7 | -1.4899      | 0.00011<br>6 | 1.60944<br>7 |
| all-cis-4,7,10,13,16-Docosapentaenoic acid | C22 H34<br>O2     | 0.34098<br>9 | -1.5522      | 8.80E-0<br>5 | 1.65517<br>7 |
| (+/-)-epi CP 47, 497                       | C21 H34<br>O2     | 0.49538<br>4 | -1.0133<br>8 | 8.31E-0<br>5 | 1.11762      |
| Lauric acid                                | C12 H24<br>O2     | 0.27122<br>4 | -1.8824<br>5 | 8.25E-0<br>5 | 2.05958<br>5 |



|                                |               |              |              |              |              |
|--------------------------------|---------------|--------------|--------------|--------------|--------------|
| Decanoic acid                  | C10 H20<br>O2 | 0.2722       | -1.8772<br>6 | 6.27E-0<br>5 | 2.04857<br>8 |
| FAHFA (18:2/17:2)              | C35 H60<br>O4 | 0.19295<br>8 | -2.3736<br>4 | 2.42E-0<br>5 | 2.60920<br>6 |
| 8Z,11Z,14Z-Eicosatrienoic acid | C20 H34<br>O2 | 0.34926<br>6 | -1.5176      | 6.78E-0<br>6 | 1.65542<br>7 |

70

71

**Supplementary Table 4. The oligonucleotides used in this study.**

| Gene                 | Primer    | Sequence(5' to 3')             |
|----------------------|-----------|--------------------------------|
| TNF- $\alpha$        | sense     | 5'- CCCTCACACTCAGATCATCTTCT-3' |
|                      | antisense | 5'- GCTACGACGTGGGCTACAG-3'     |
| IL-1 $\beta$         | sense     | 5'- GCAACTGTTCCCTGAACTCAACT-3' |
|                      | antisense | 5'-ATCTTTTGGGGTCCGTCAACT-3'    |
| IL-6                 | sense     | 5'- TAGTCCTTCCTACCCCAATTTCC-3' |
|                      | antisense | 5'-TTGGTCCTTAGCCACTCCTTC-3'    |
| TGR5                 | sense     | 5'- CCTGGCAAGCCTCATCGTC-3'     |
|                      | antisense | 5'- AGCAGCCCGGCTAGTAGTAG-3'    |
| CAR                  | sense     | 5'- CCCTGACAGACCCGGAGTTA-3'    |
|                      | antisense | 5'- GCCGAGACTGTTGTTCCATAAT-3'  |
| VDR                  | sense     | 5'- ACCCTGGTGACTTTGACCG-3'     |
|                      | antisense | 5'- GGCAATCTCCATTGAAGGGG-3'    |
| GR                   | sense     | 5'- AGCTCCCCCTGGTAGAGAC-3'     |
|                      | antisense | 5'- GGTGAAGACGCAGAAACCTTG-3    |
| FXR                  | sense     | 5'-GCTTGATGTGCTACAAAAGCTG-3'   |
|                      | antisense | 5'- CGTGGTGATGGTTGAATGTCC-3    |
| PXR                  | sense     | 5'- GATGGAGGTCTTCAAATCTGCC-3'  |
|                      | antisense | 5'- GGCCCTTCTGAAAACCCCT-3      |
| $\alpha$ 5 $\beta$ 1 | sense     | 5'-ATGCCAAATCTTGCGGAGAAT-3'    |
|                      | antisense | 5'- TTTGCTGCGATTGGTGACATT-3    |
| GAPDH                | sense     | 5'-AACTTTGGCATTGTGGAAGG-3'     |
|                      | antisense | 5'-ACACATTGGGGGTAGGAACA-3'     |

72

73

74

75

76

77

78

79

80

81

82

83

84 **Original blots presented in the manuscript**

85

86 Fig 2N ZO-1

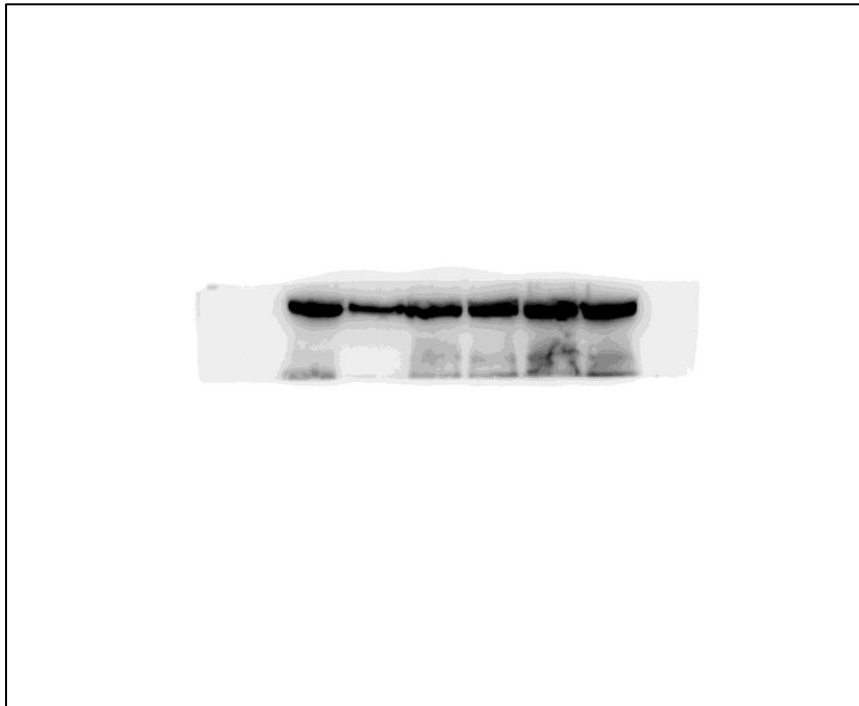

87

88 Fig 2N Occludin

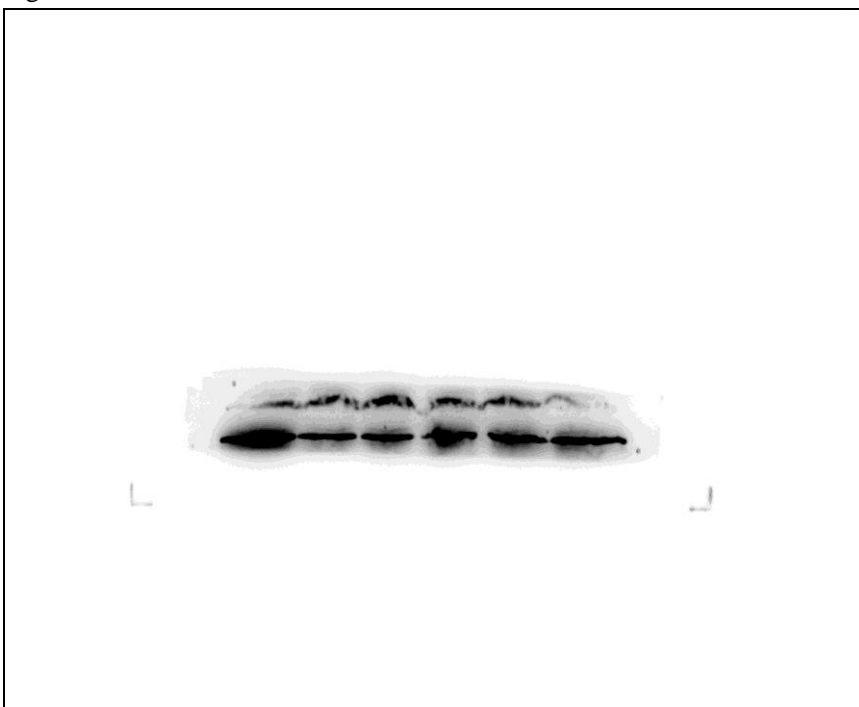

89

90 Fig 2N Claudin-3

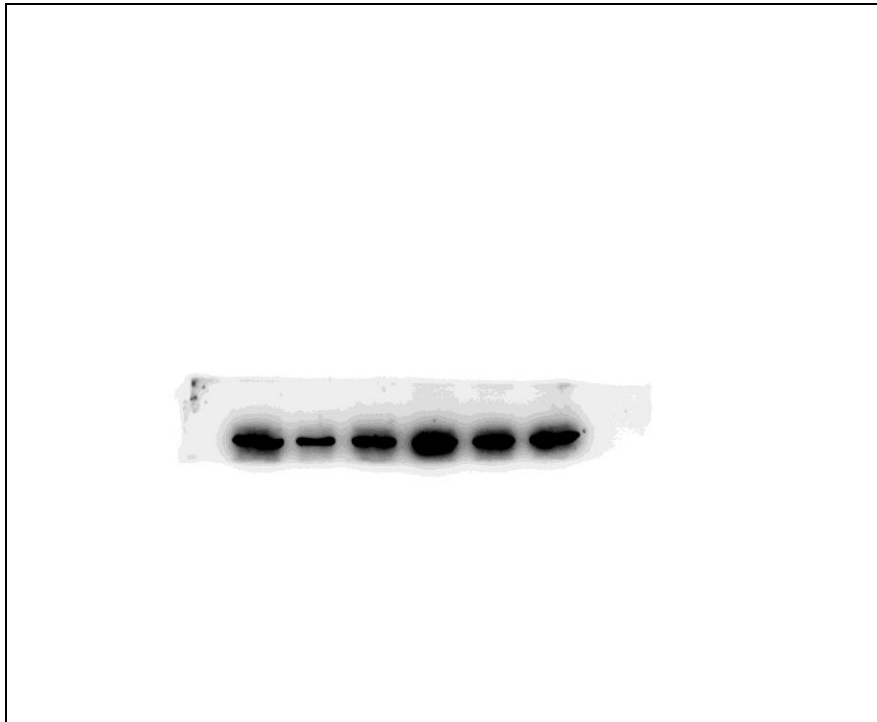

91

92 Fig 2N actin

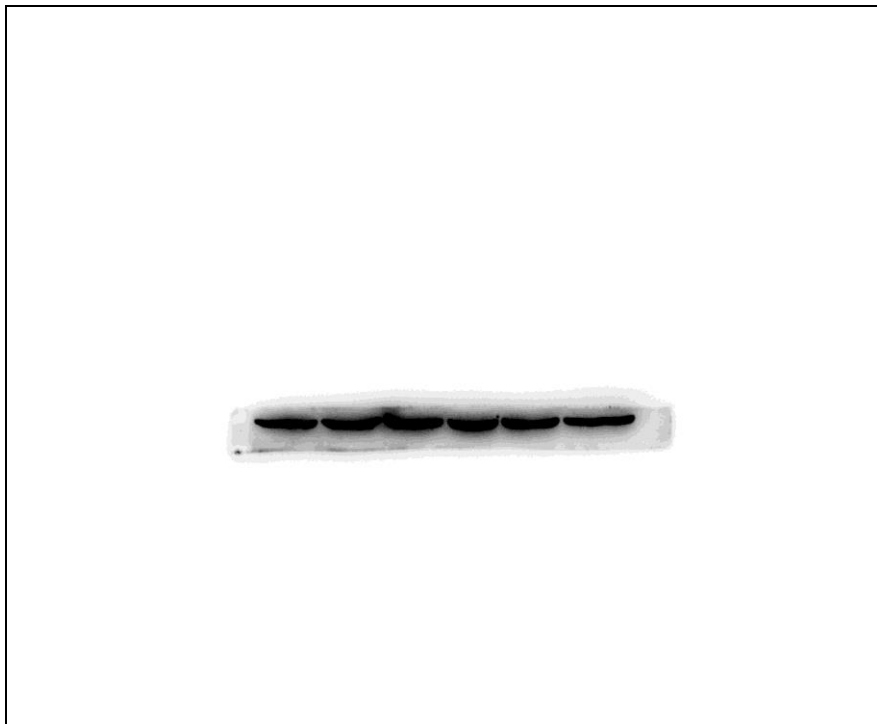

93

94

95 Fig 4A NLRP3

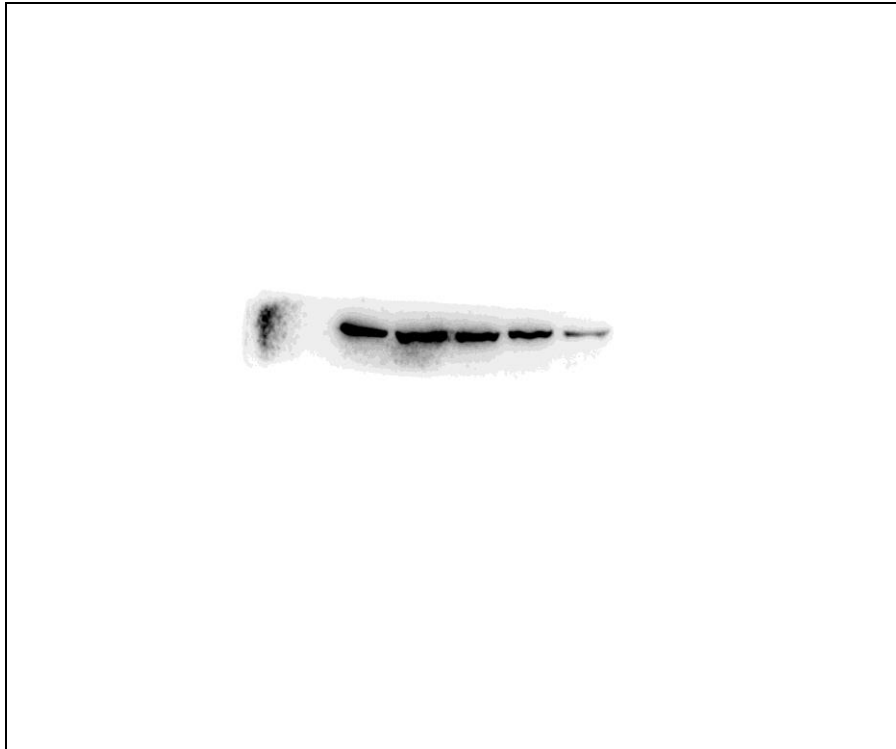

96  
97

98 Fig 4A ASC

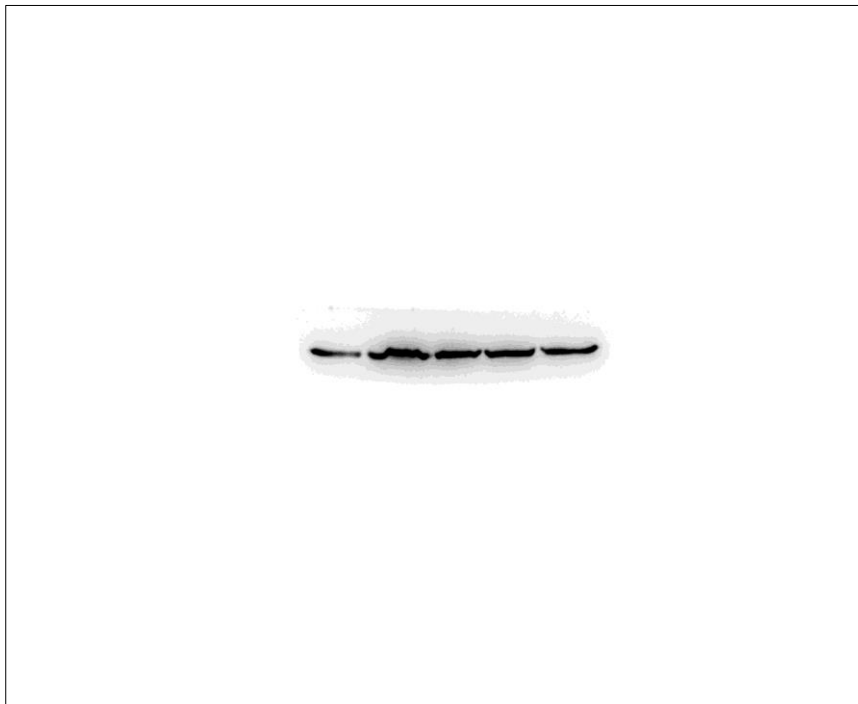

99

100 Fig 4A Caspase-1

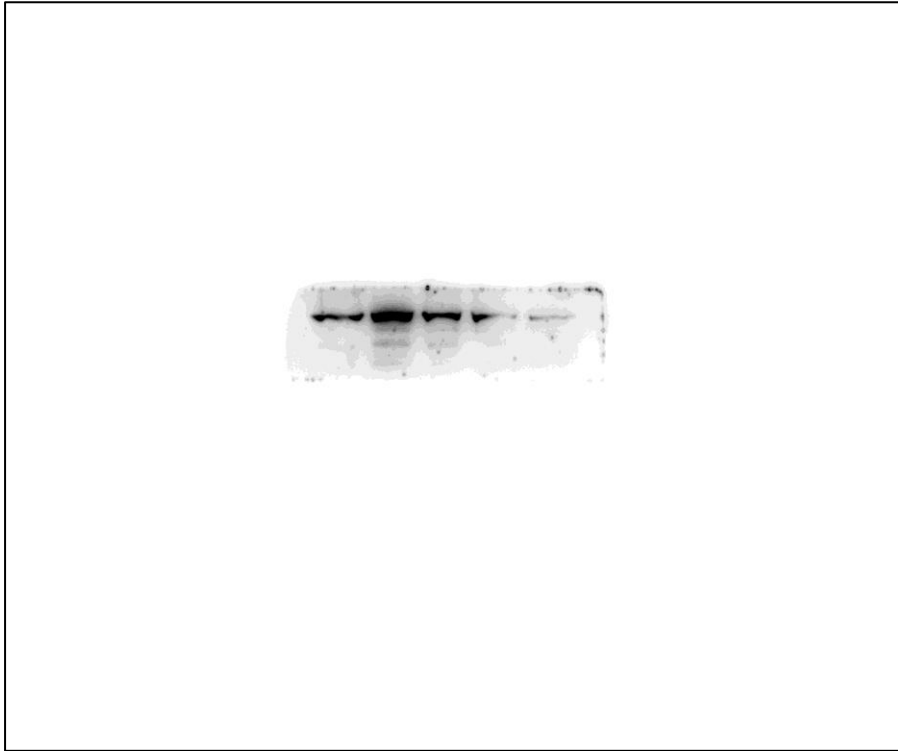

101

102 Fig 4A IL-1 $\beta$

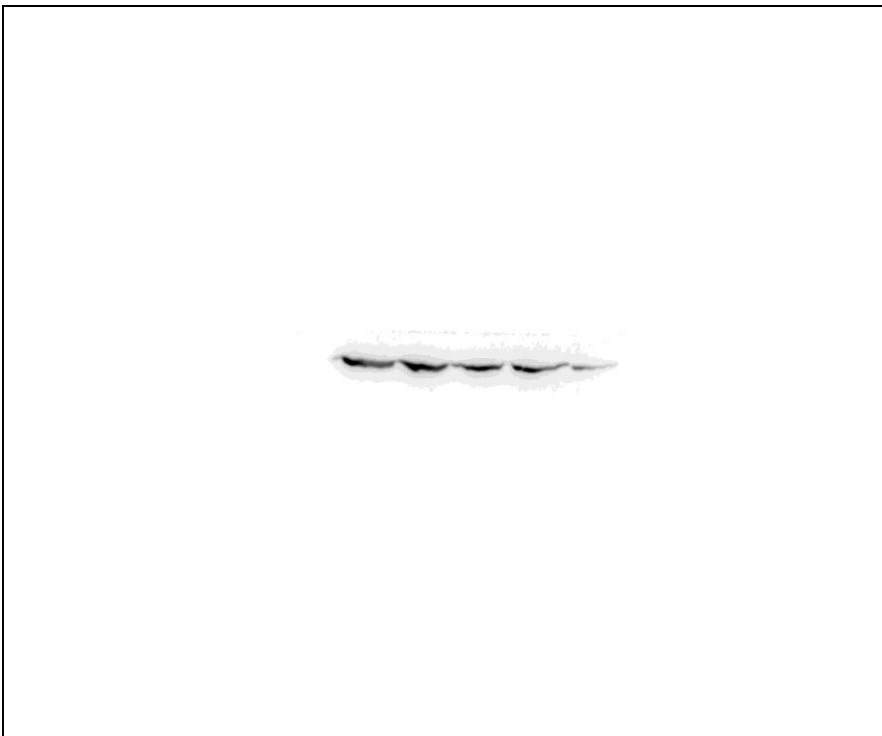

103

104 Fig 4A p-p65

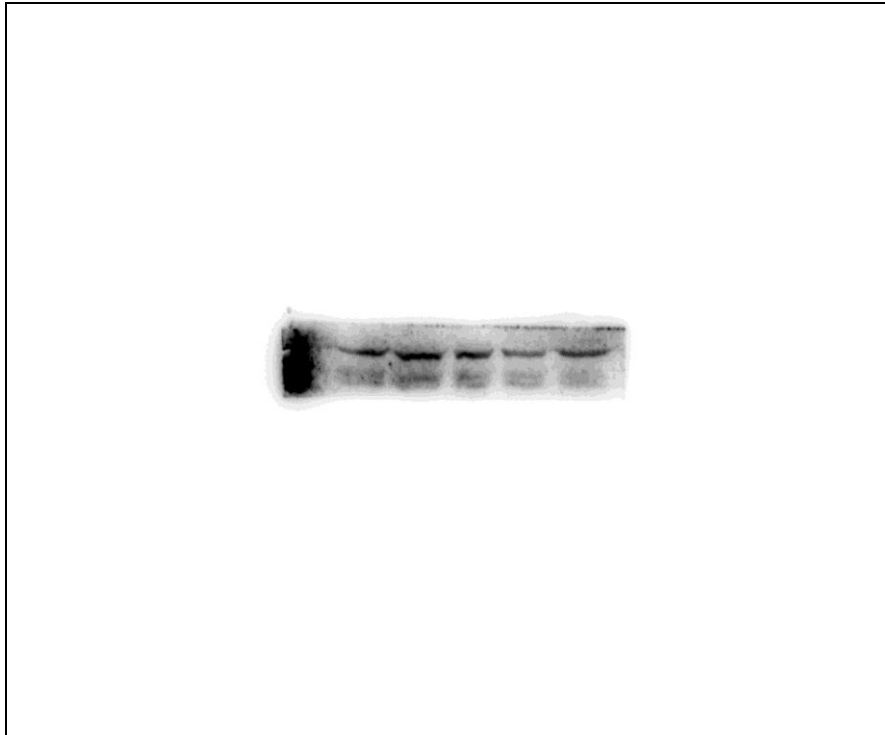

105

106 Fig 4A p65

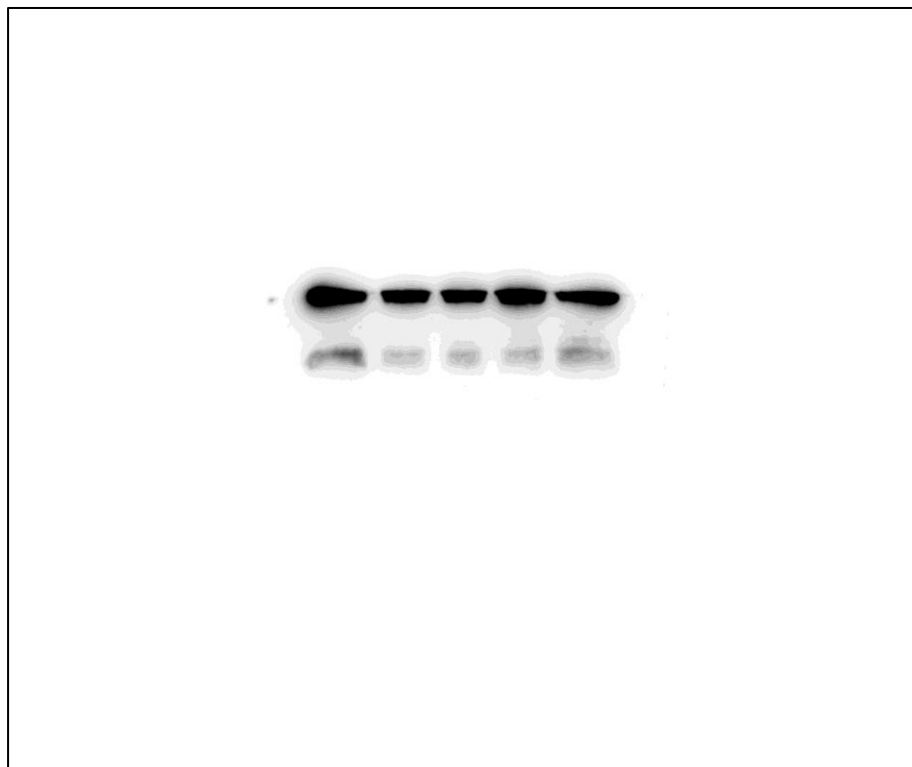

107

108 Fig 4A p-IkB

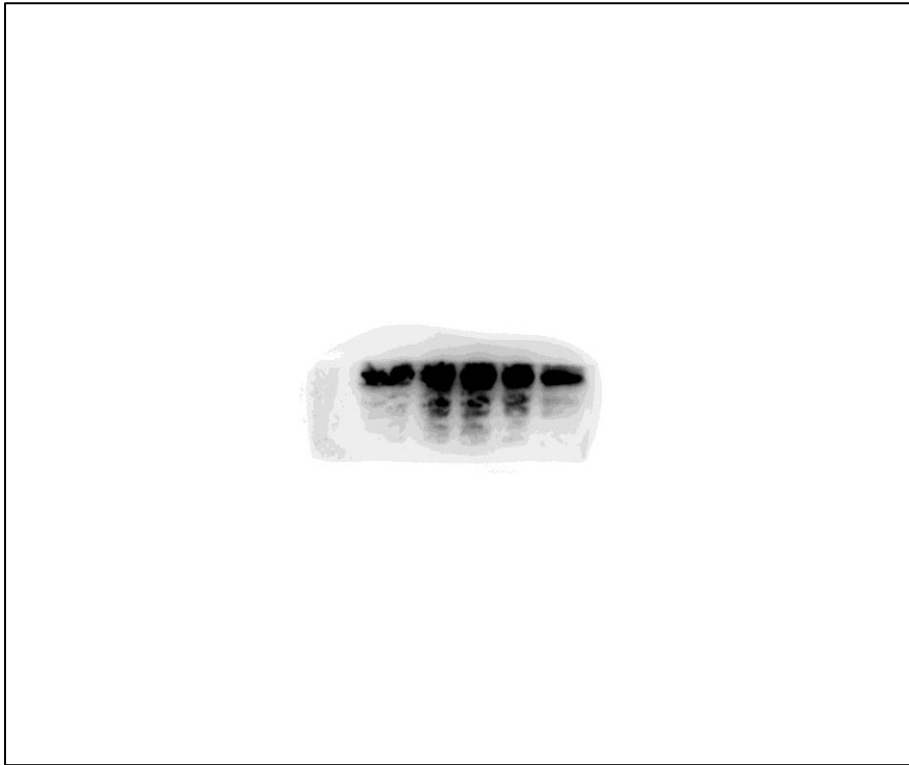

109

110 Fig 4A IκB

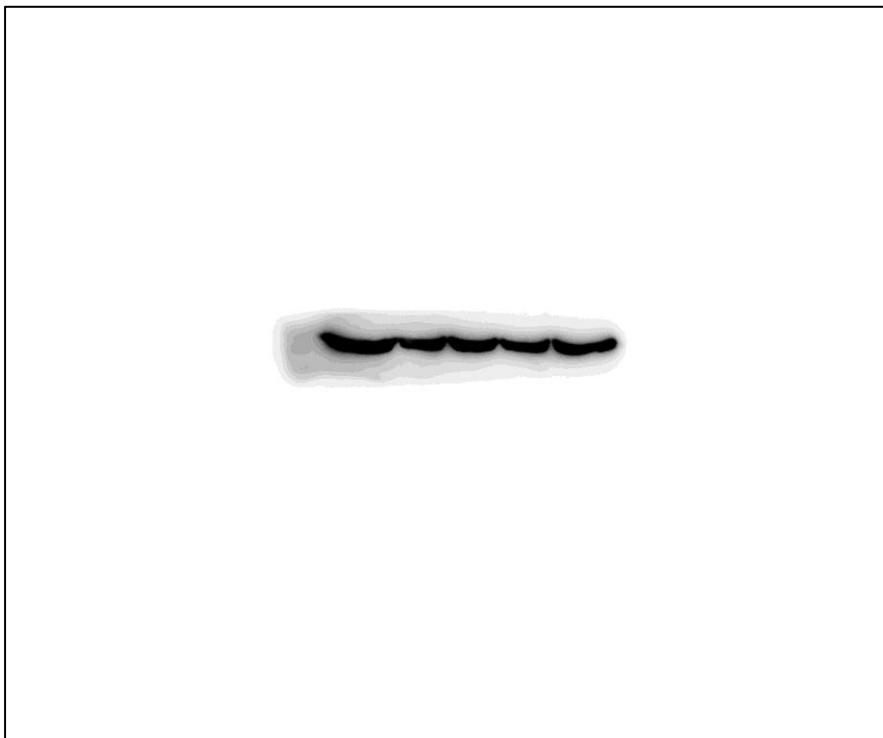

111

112

113 Fig 4A actin

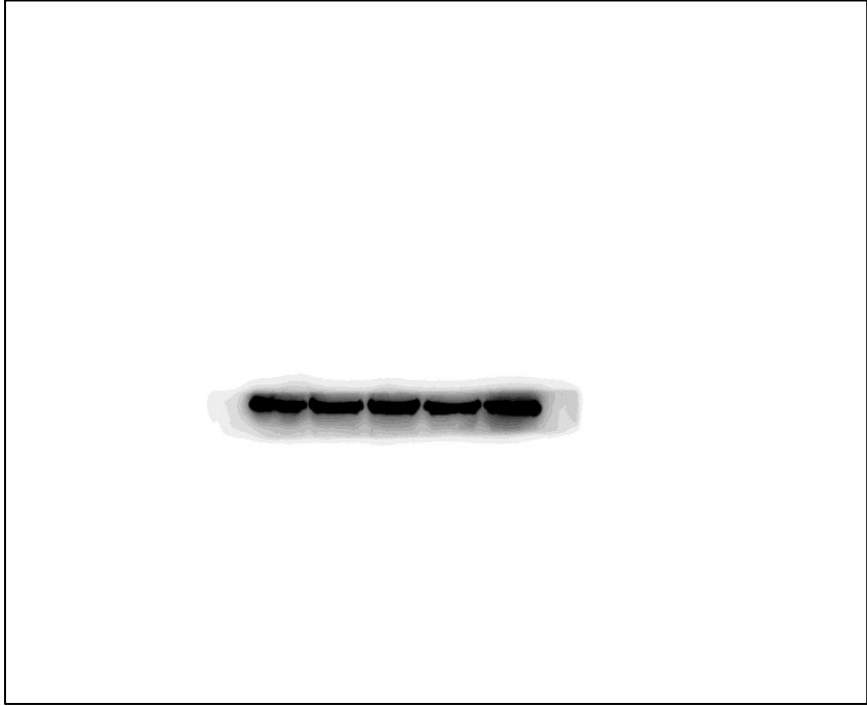

114

115 Fig 4H NLRP3

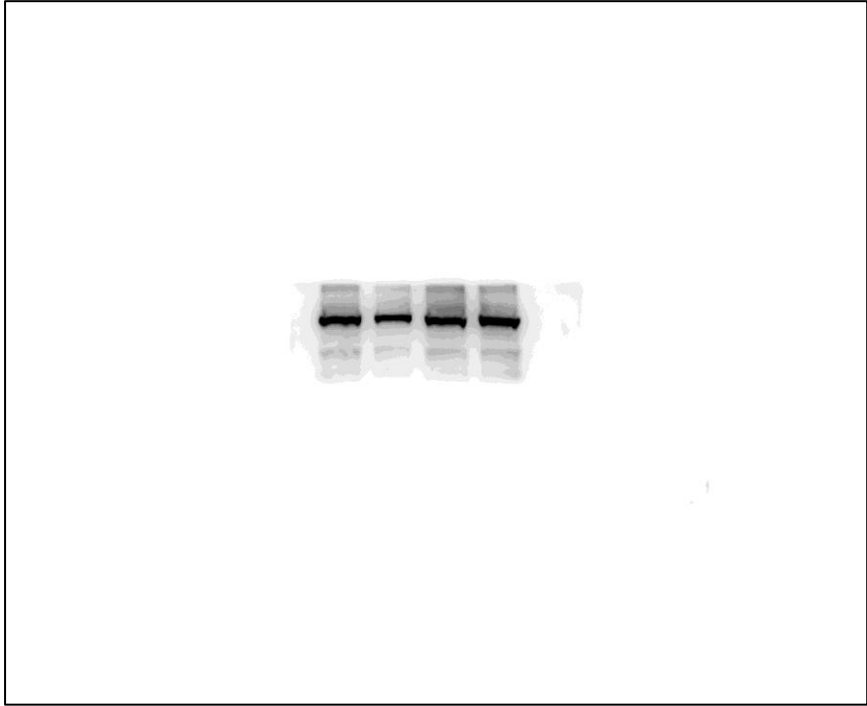

116

117 Fig 4H ASC



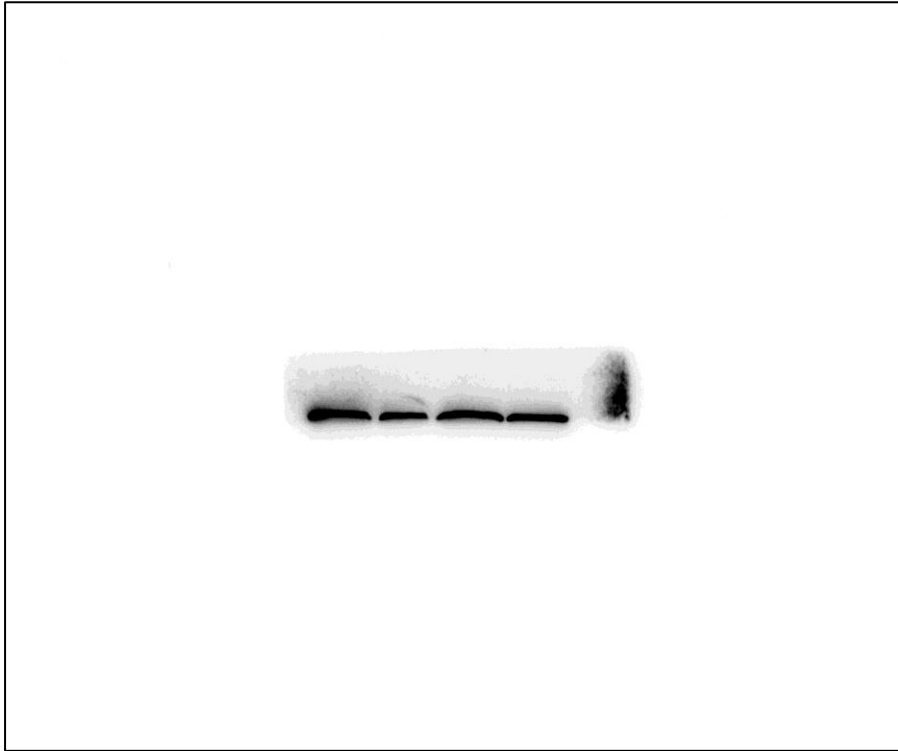

118

119 Fig 4H Caspase-1

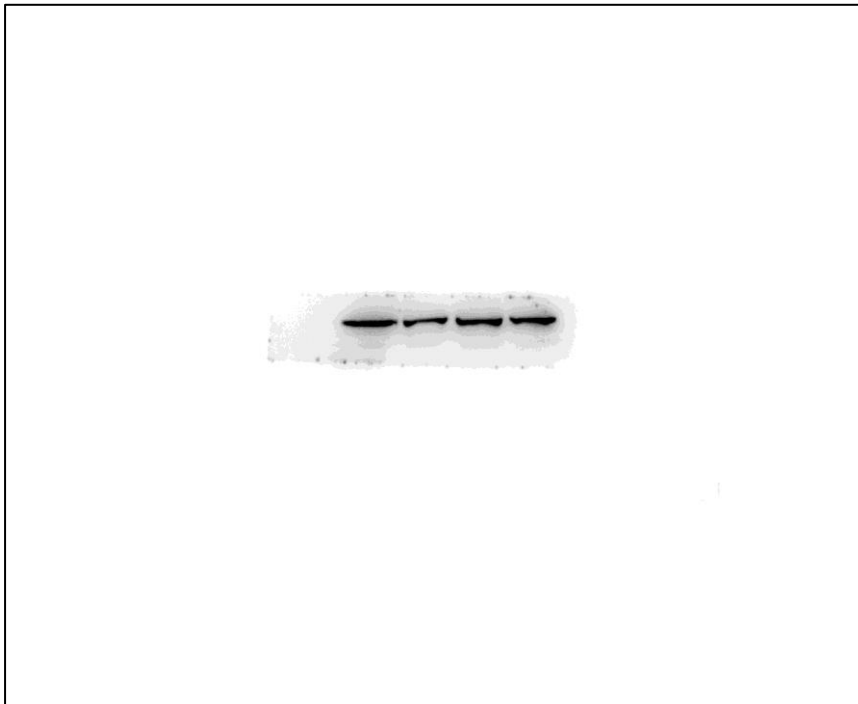

120

121 Fig 4H IL-1β

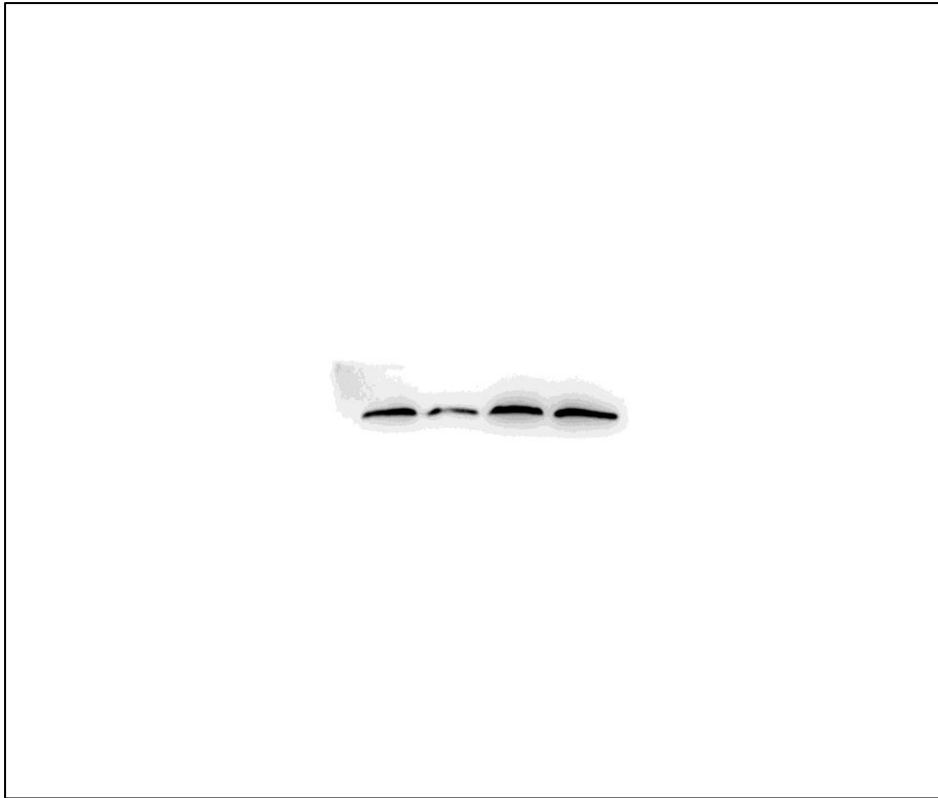

122

123 Fig 4H p-p65

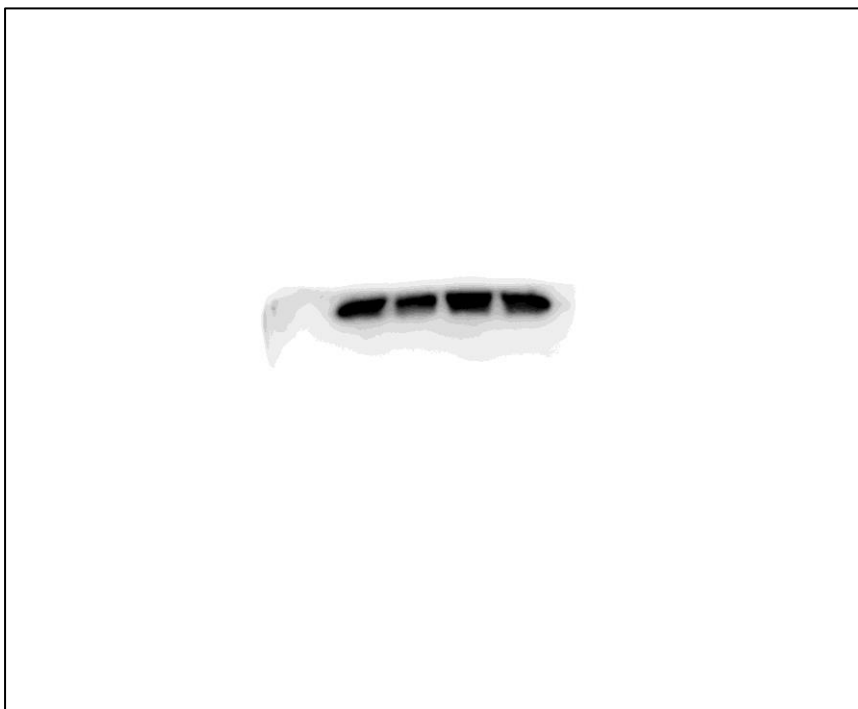

124

125 Fig 4H p65

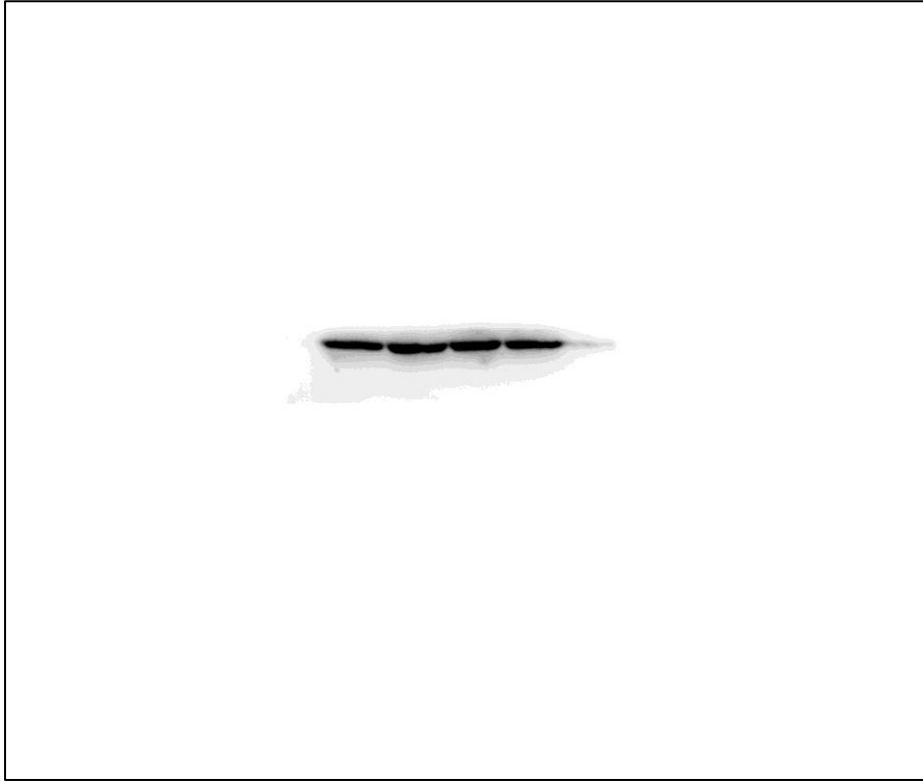

126

127

Fig 4H p-IκB

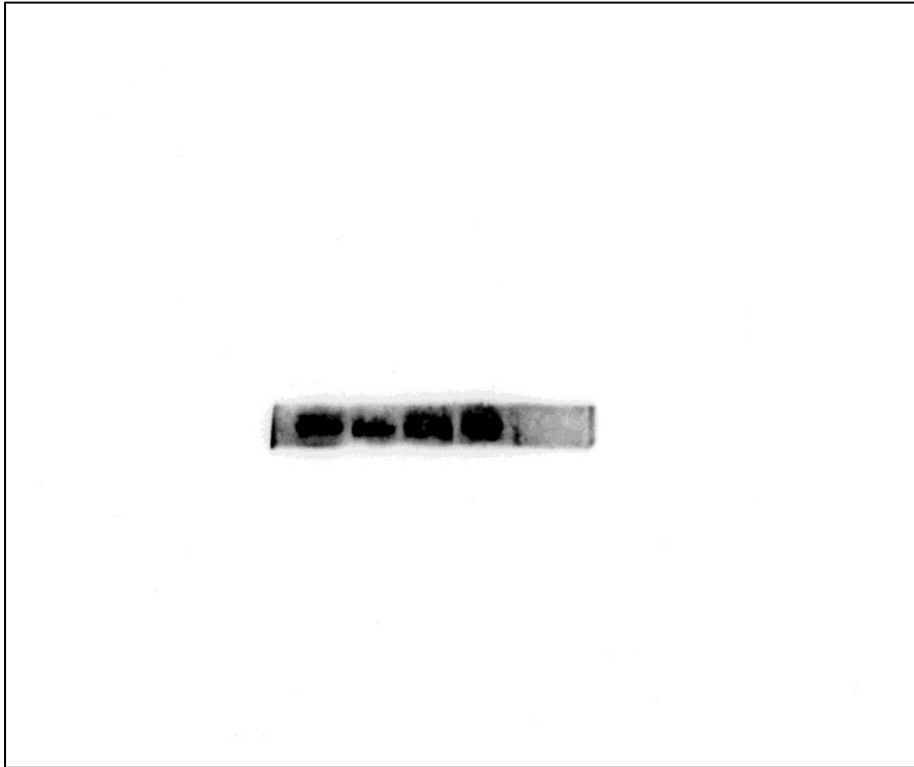

128

129

Fig 4H IκB

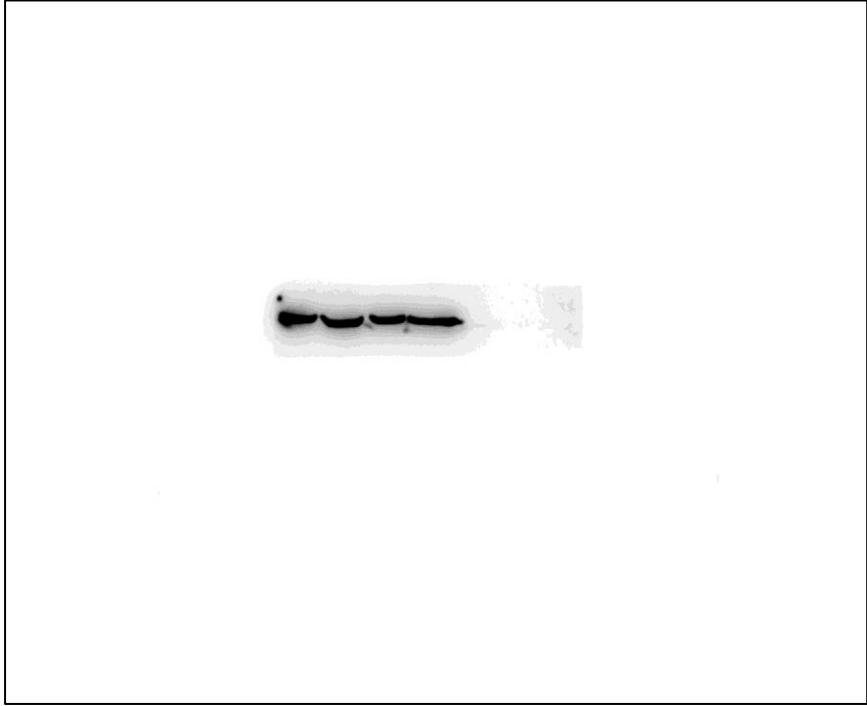

130

131 Fig 4H actin

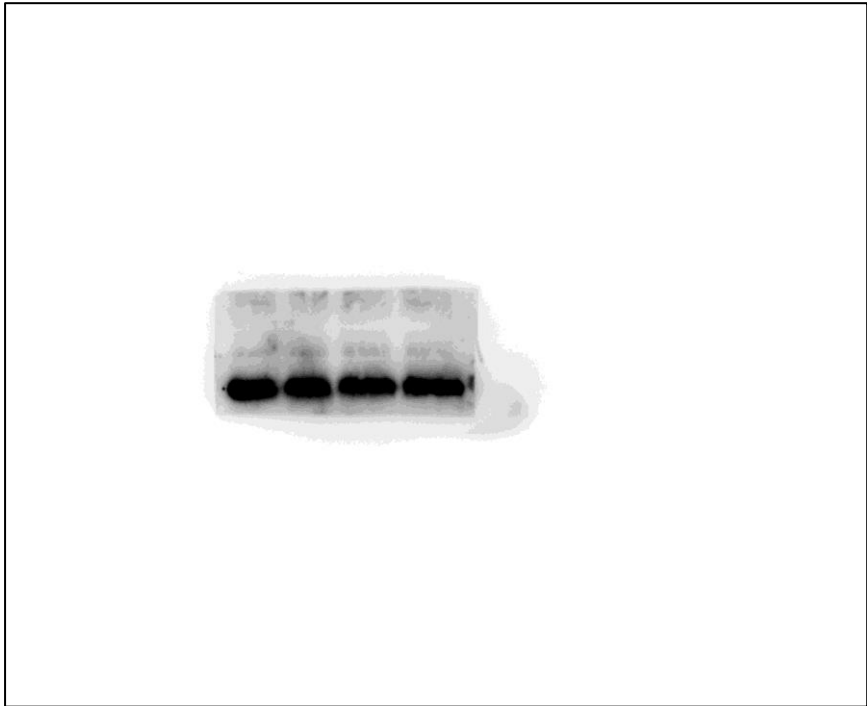

132

133 Fig 4O NLRP3

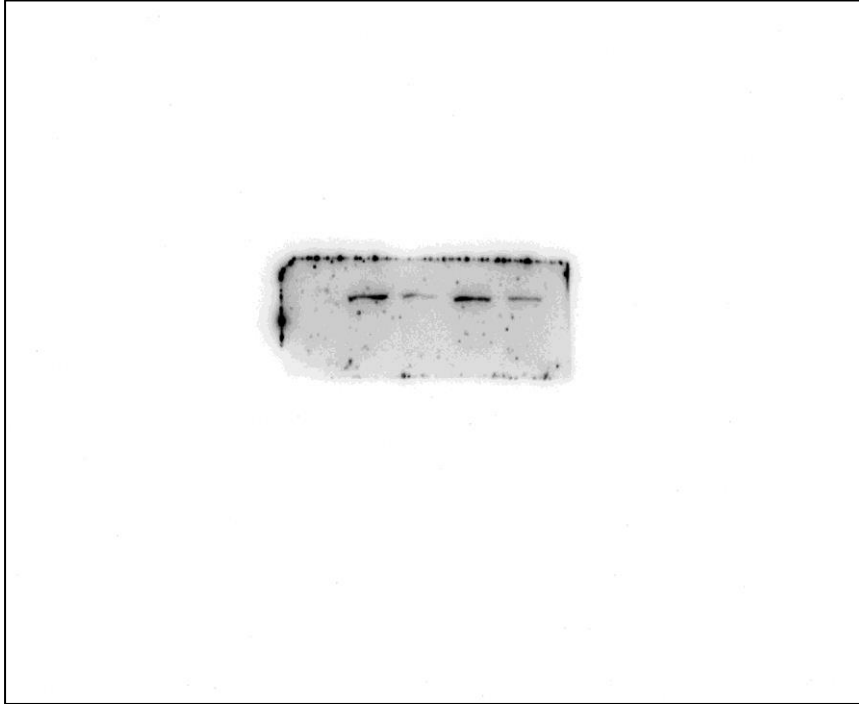

134

135 Fig 4O ASC

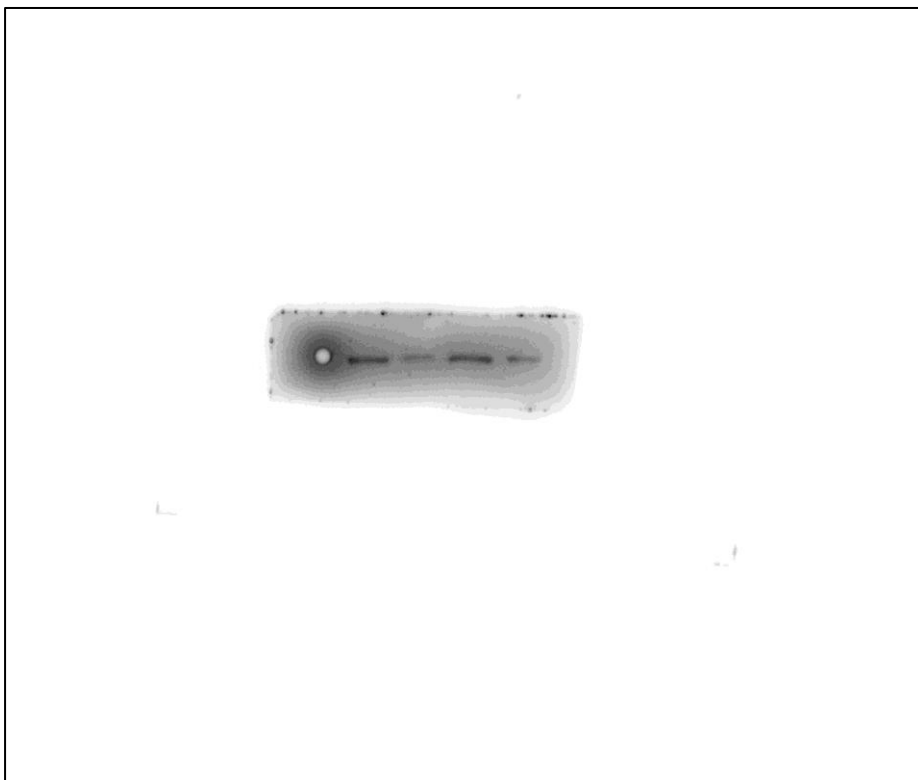

136

137 Fig 4O Caspase-1

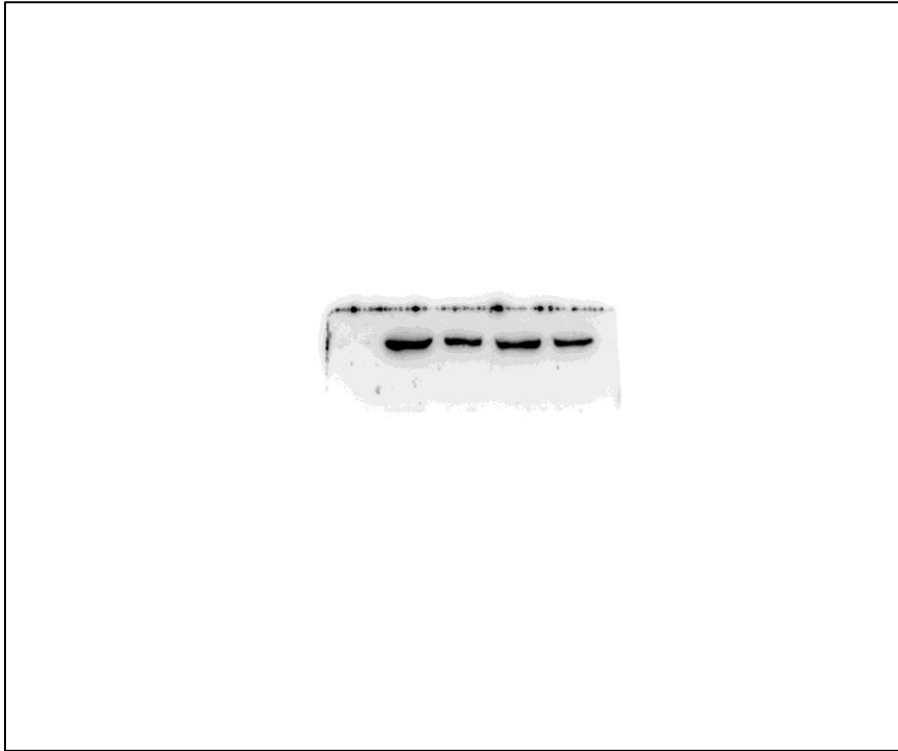

138

139 Fig 4O IL-1 $\beta$

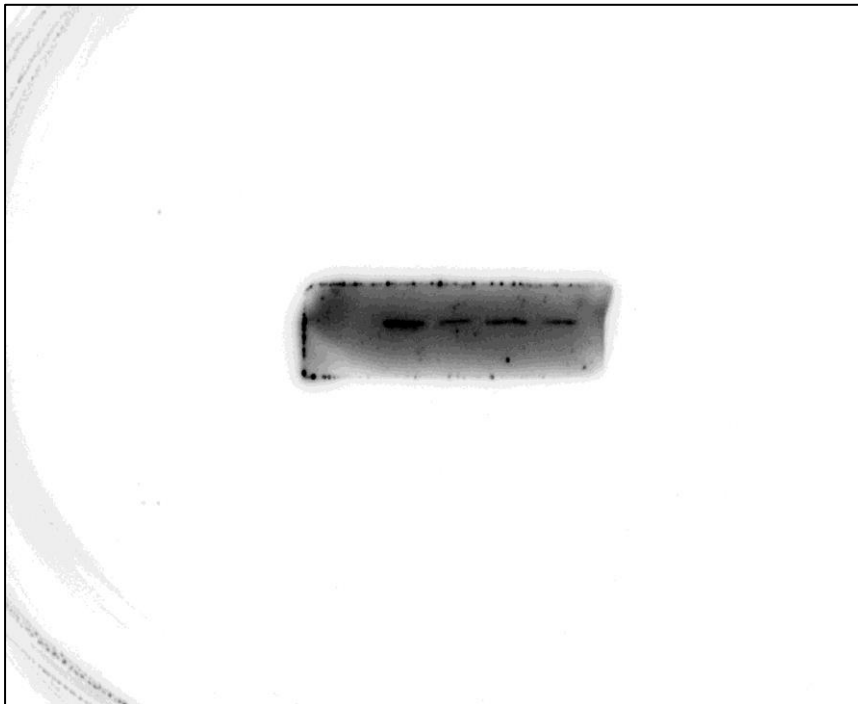

140

141 Fig 4O p-p65

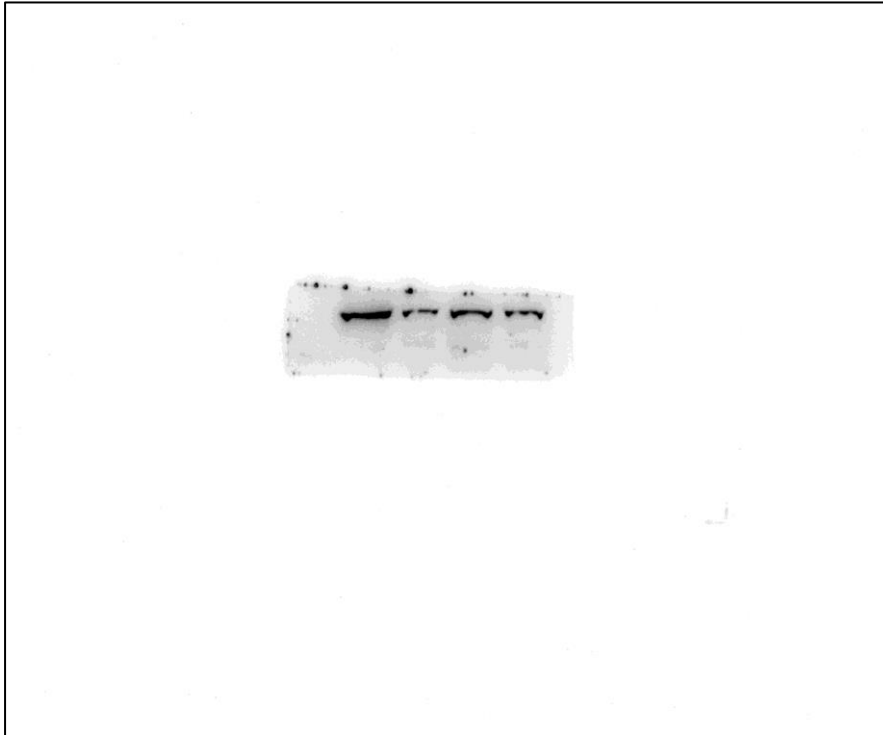

142

143

Fig 4O p65

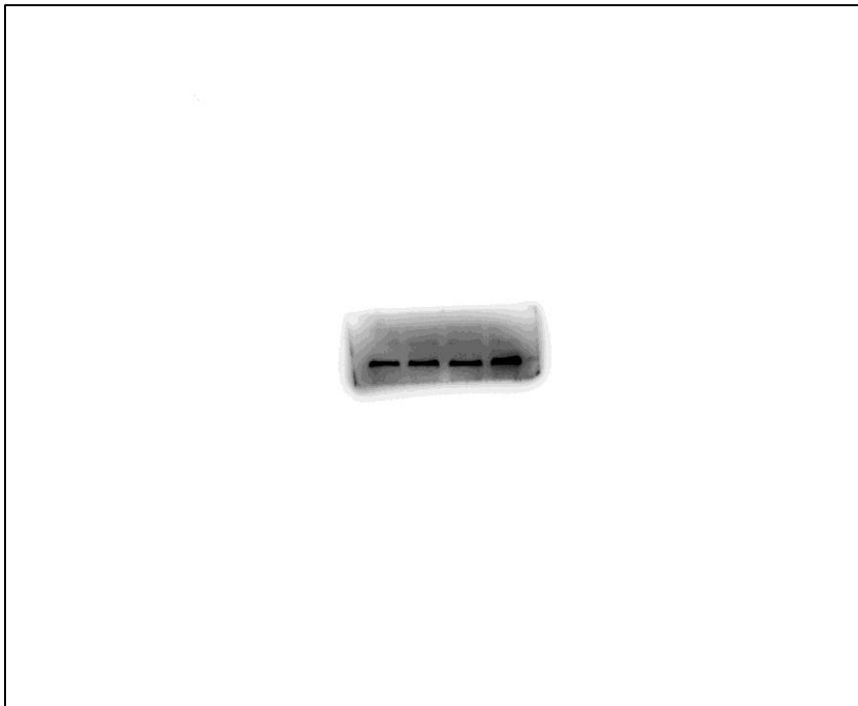

144

145

Fig 4O p-IkB

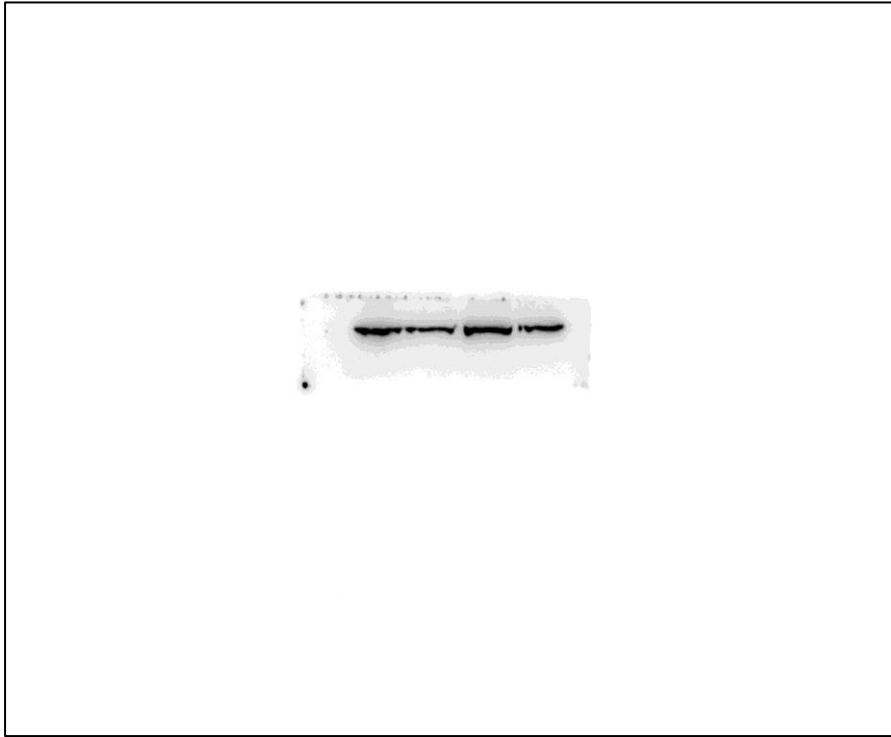

146

147

Fig 4O IκB

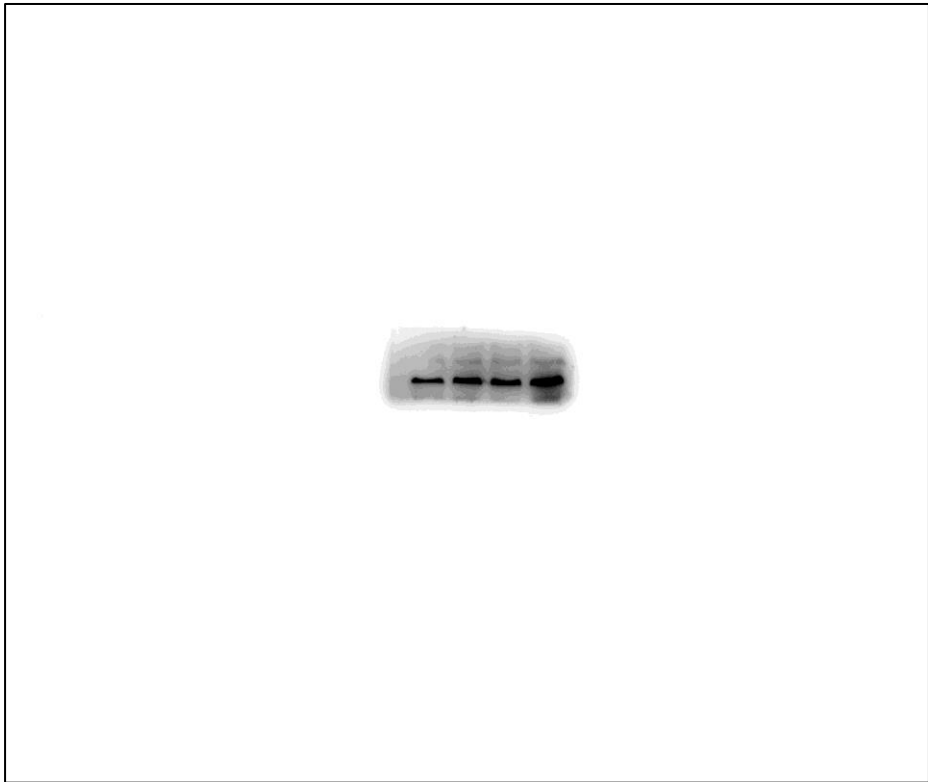

148

149

Fig 4O actin



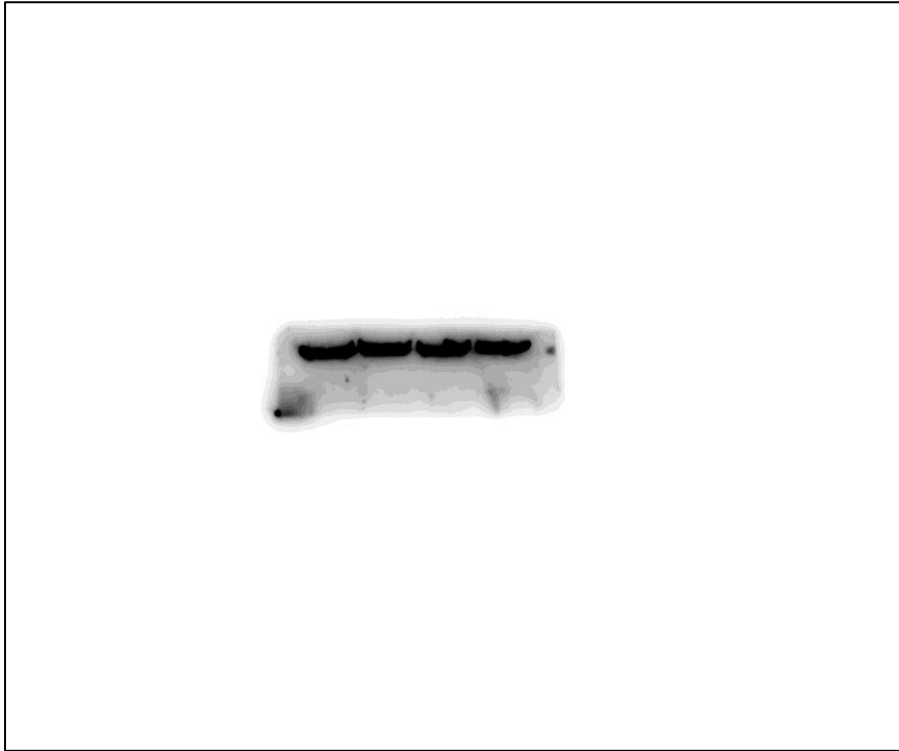

150

151 Fig 5A NLRP3

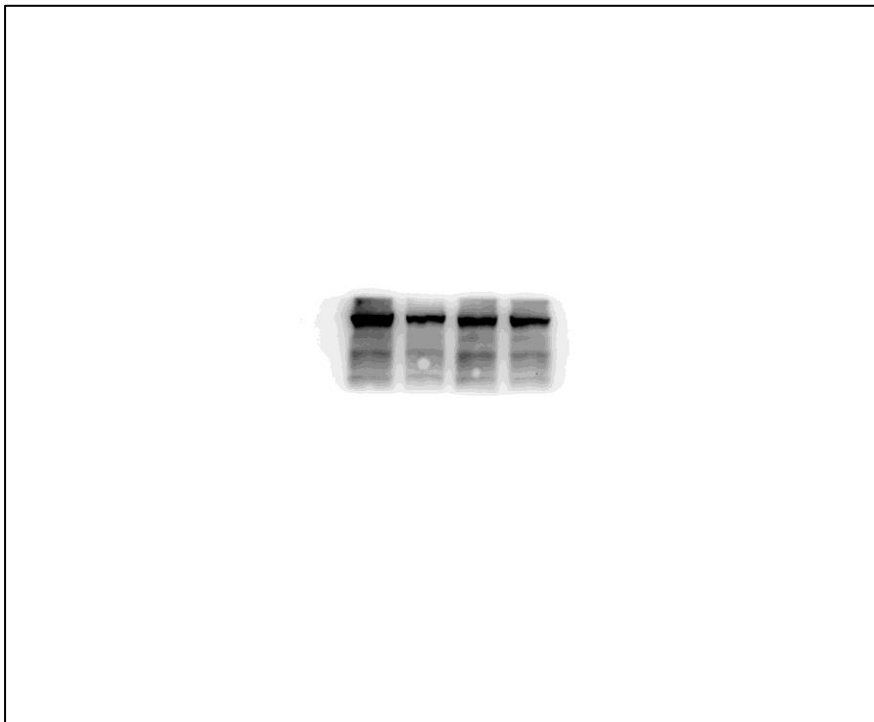

152

153 Fig 5A ASC

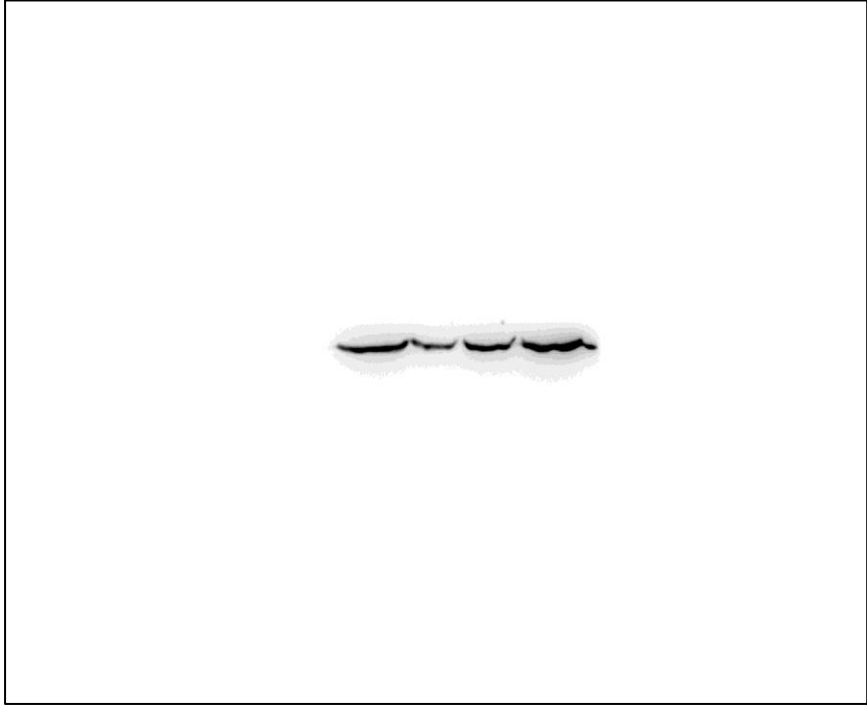

154

155 Fig 5A Caspase-1

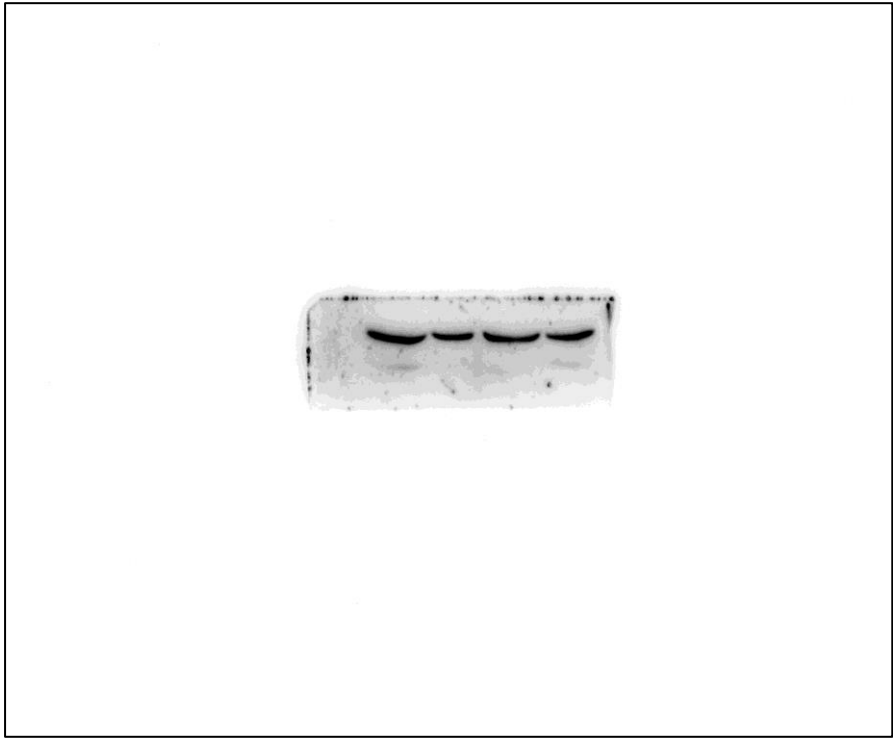

156

157 Fig 5A IL-1 $\beta$

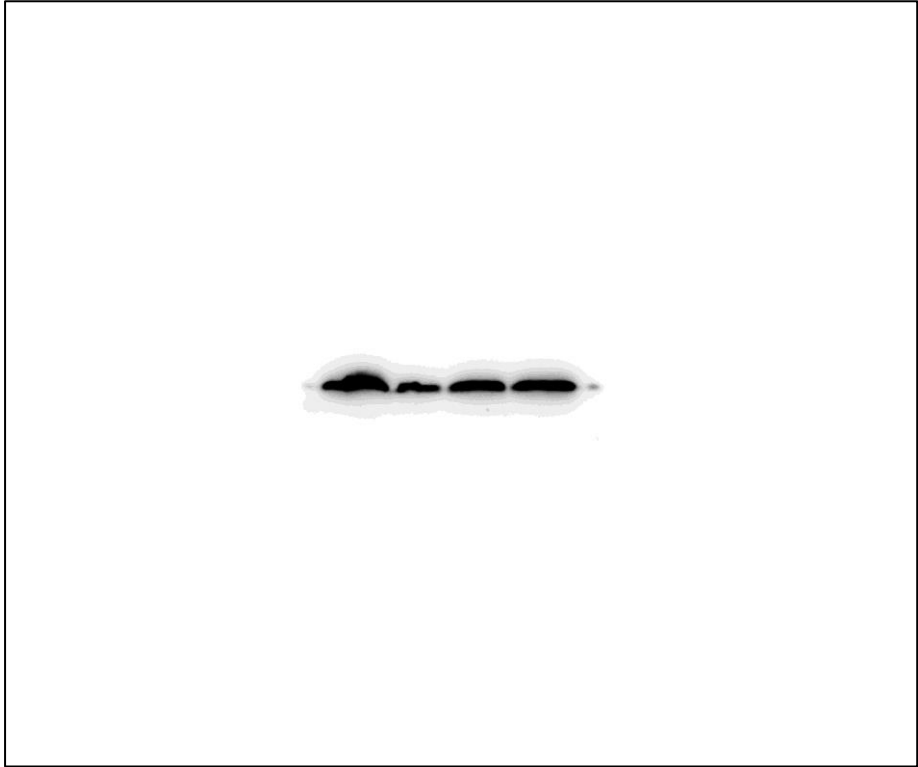

158

159 Fig 5A p-p65

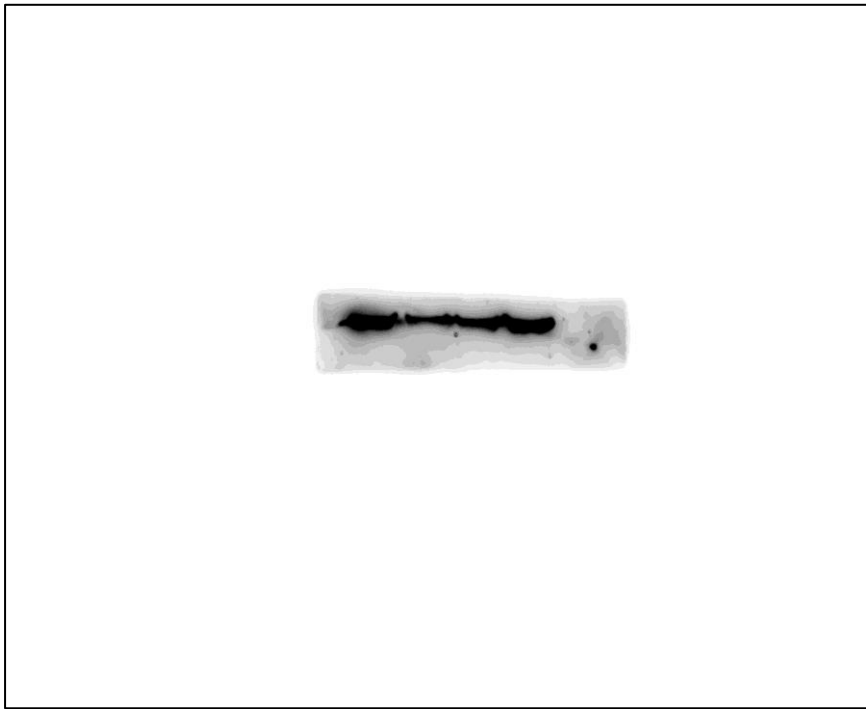

160

161 Fig 5A p65

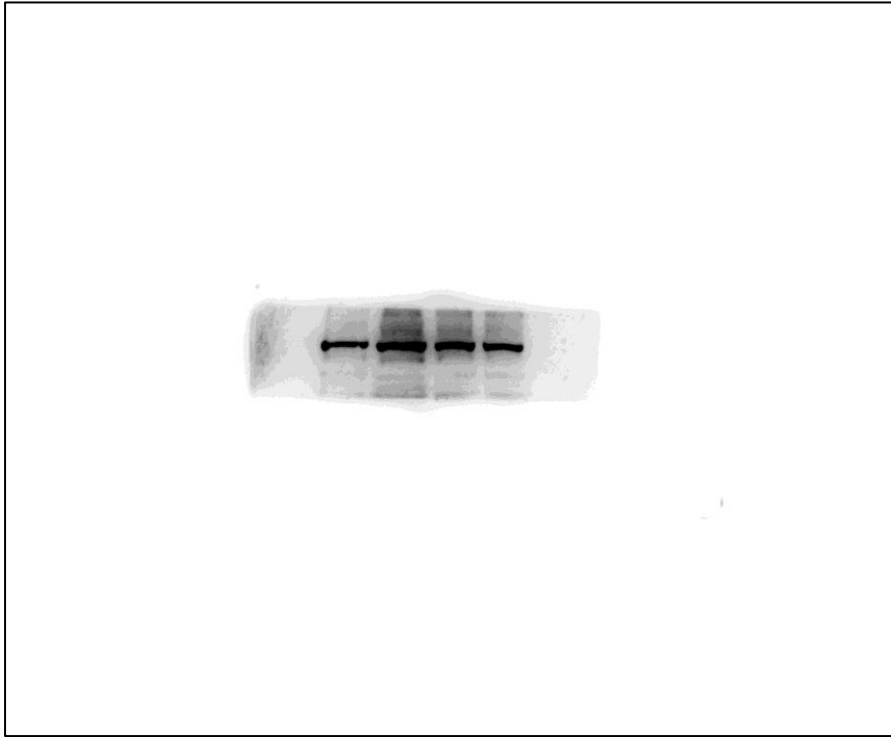

162

163

Fig 5A p-IκB

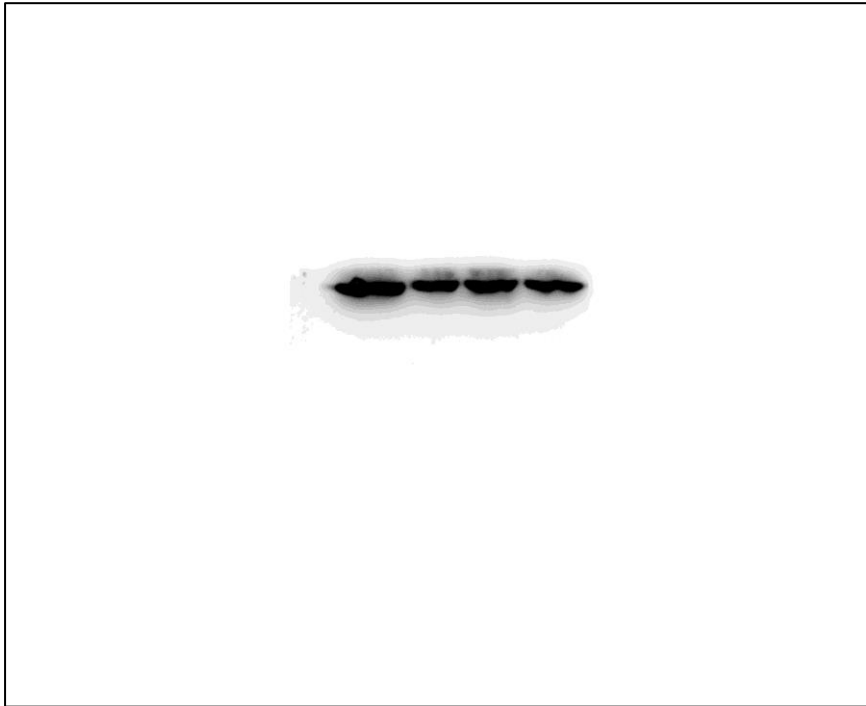

164

165

Fig 5A IκB

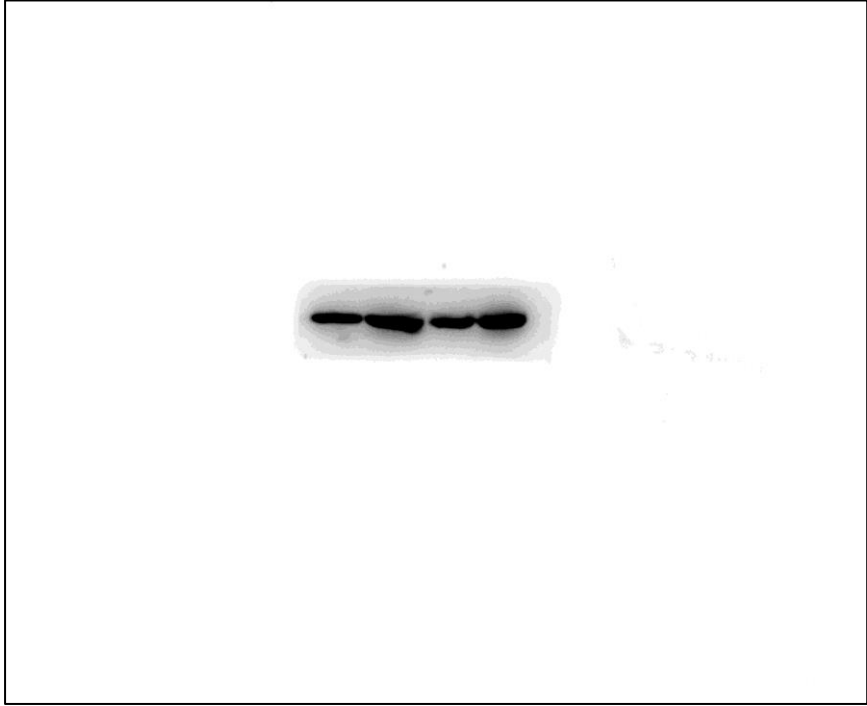

166

167 Fig 5A actin

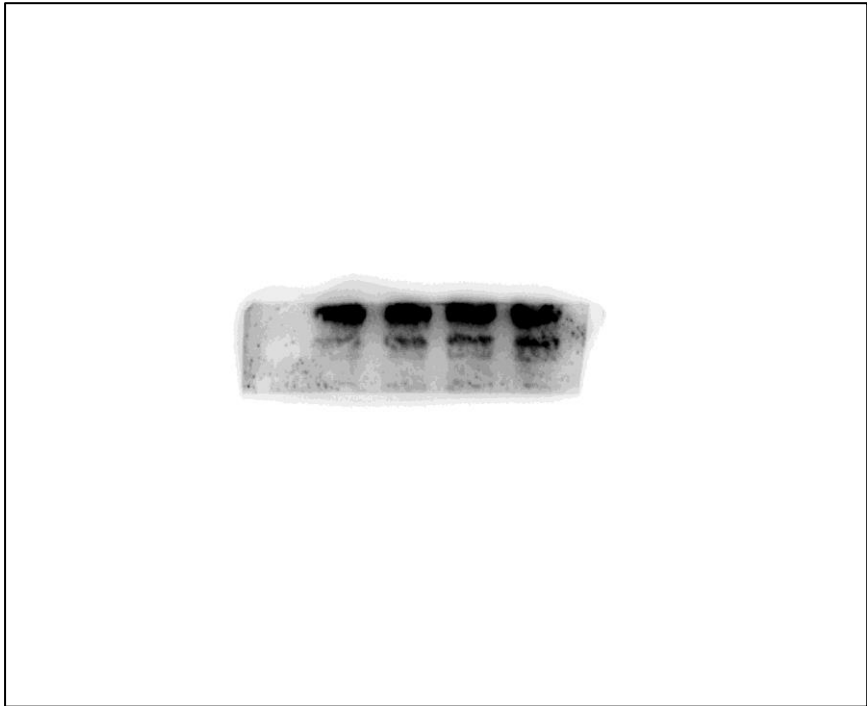

168

169 Fig 5H NLRP3

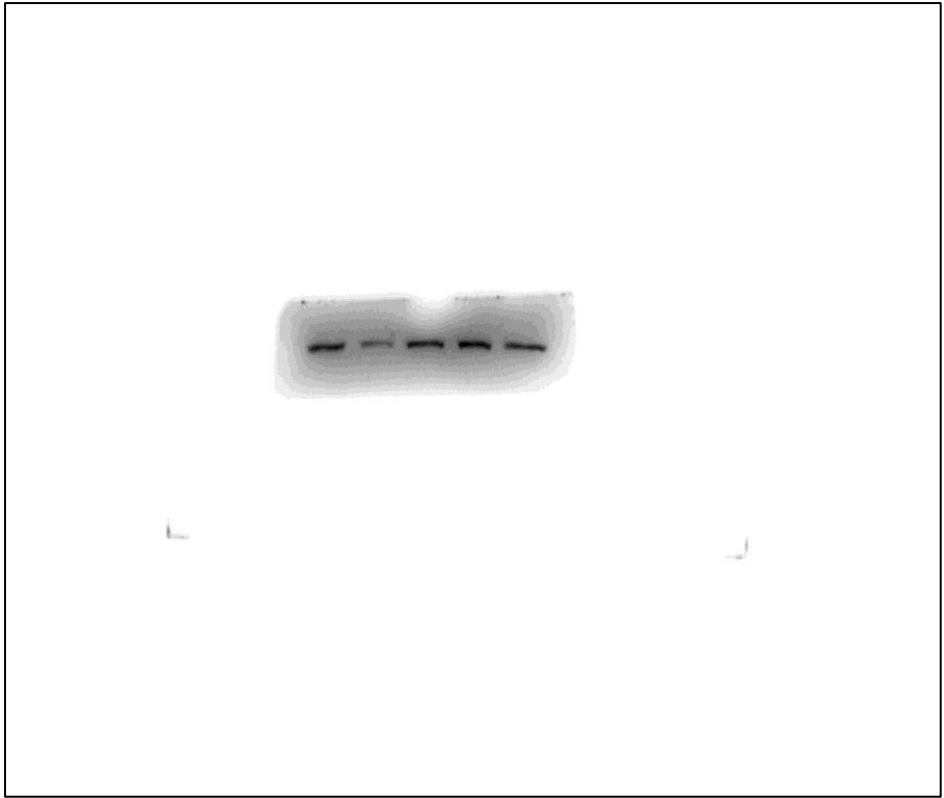

170

171 Fig 5H ASC

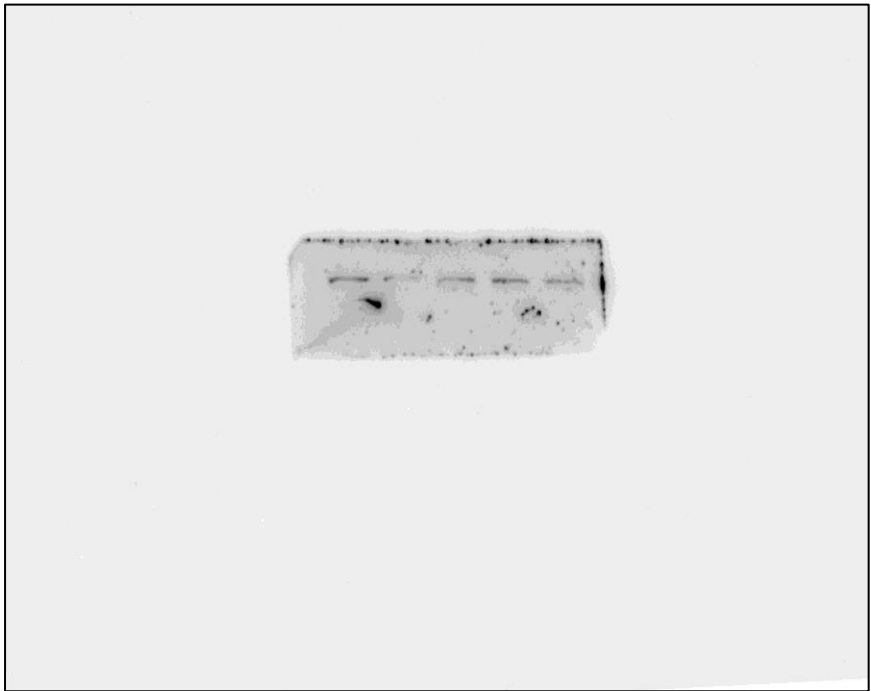

172

173 Fig 5H Caspase-1

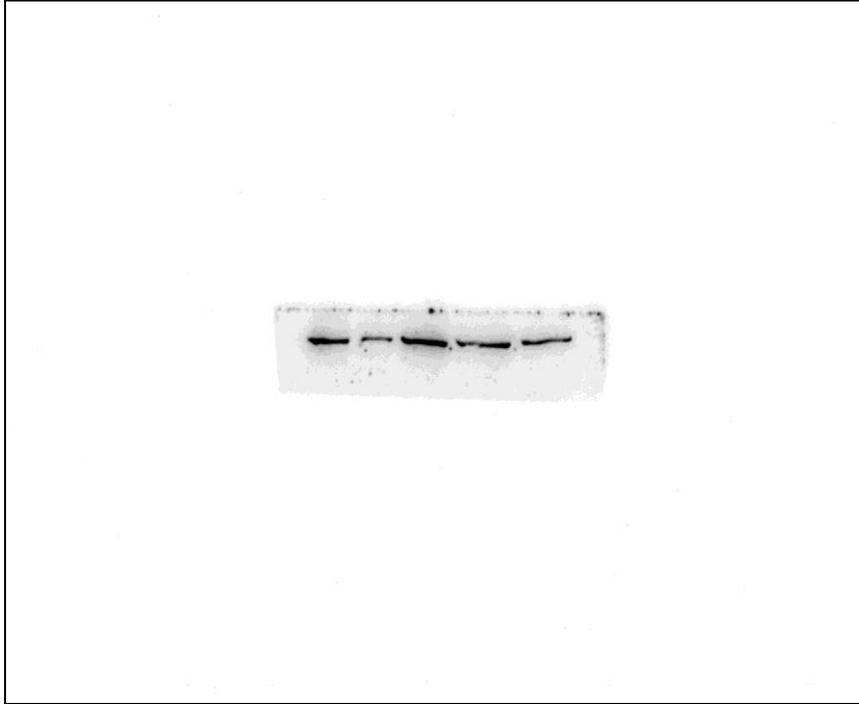

174

175 Fig 5H IL-1 $\beta$

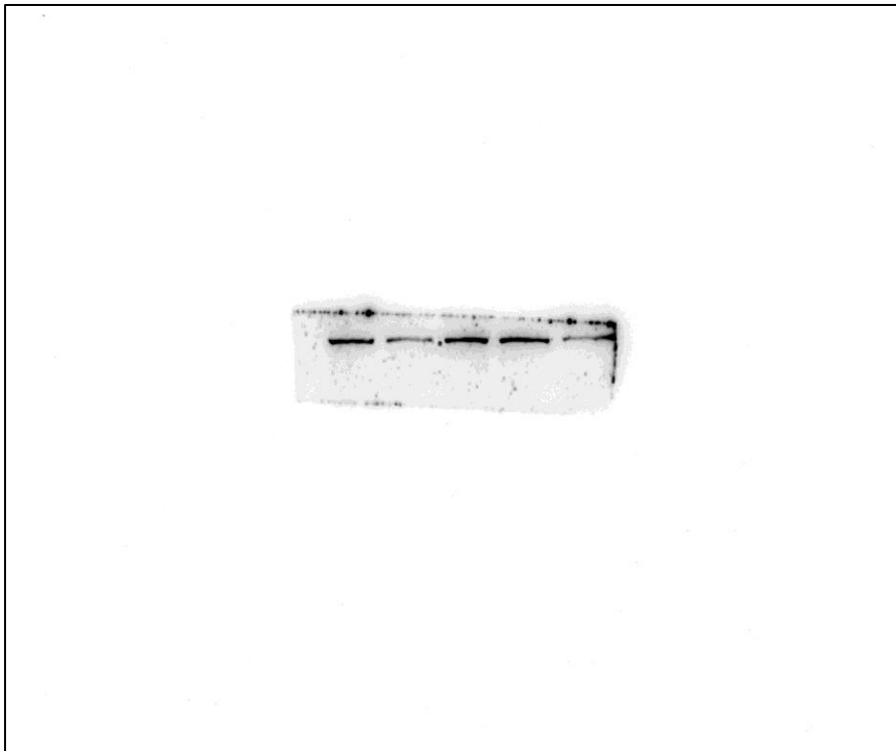

176

177 Fig 5H p-p65

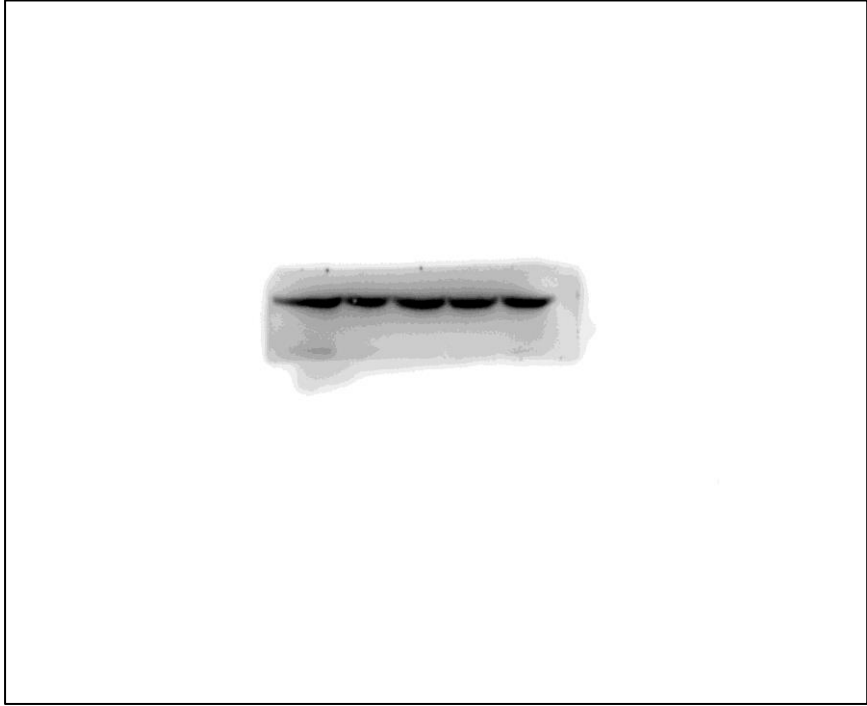

178

179 Fig 5H p65

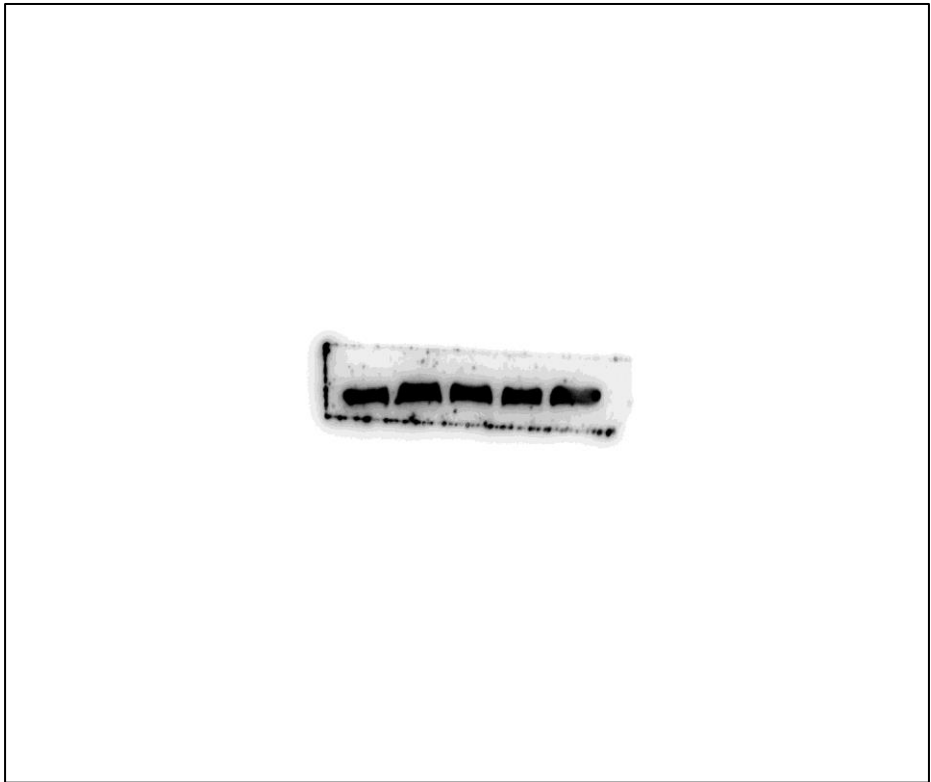

180

181 Fig 5H p-IkB



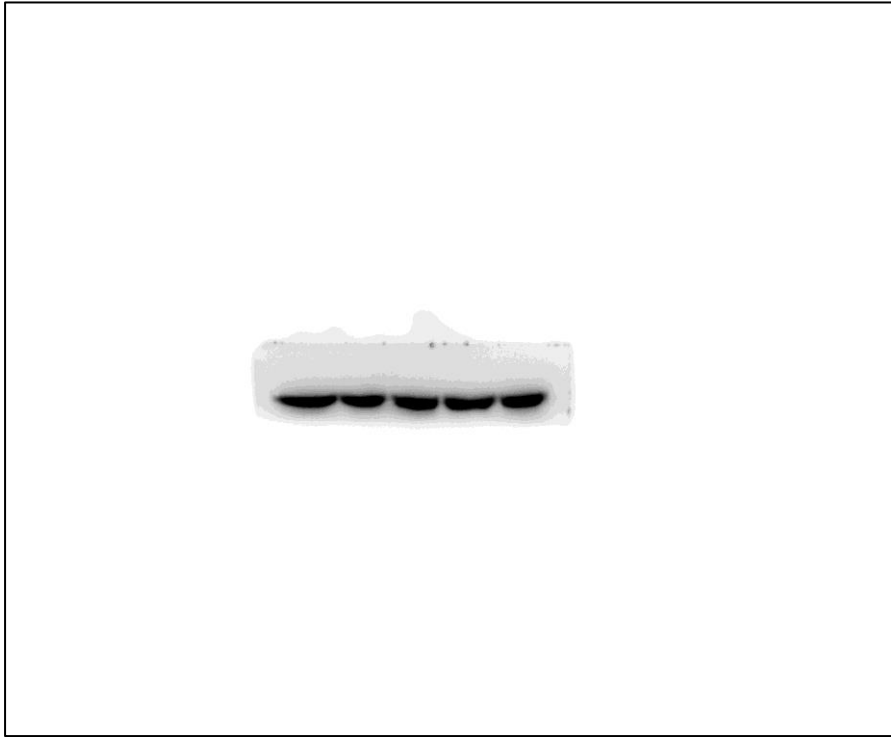

182

183

Fig 5H IκB

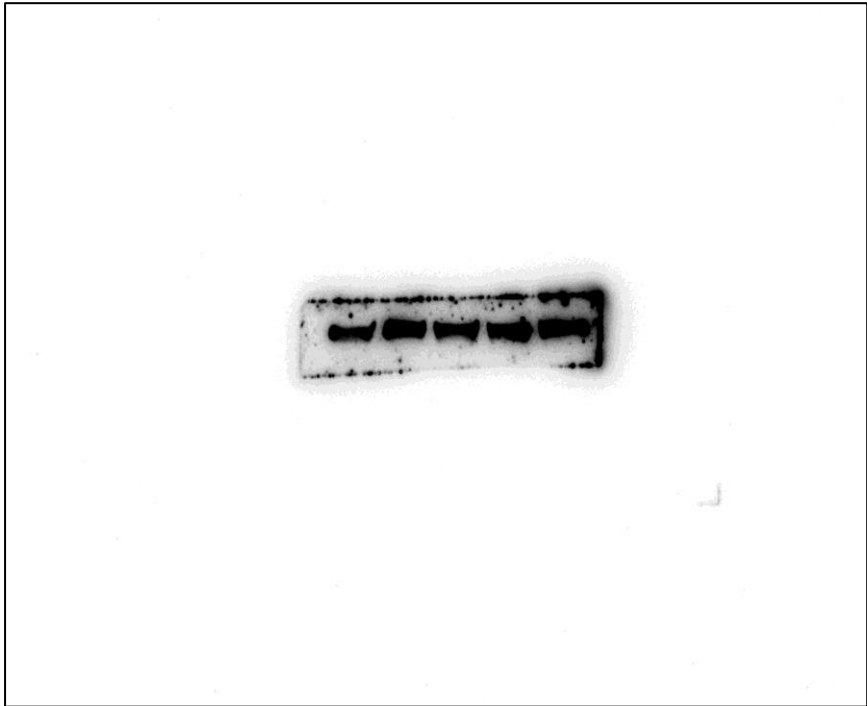

184

185

Fig 5H actin

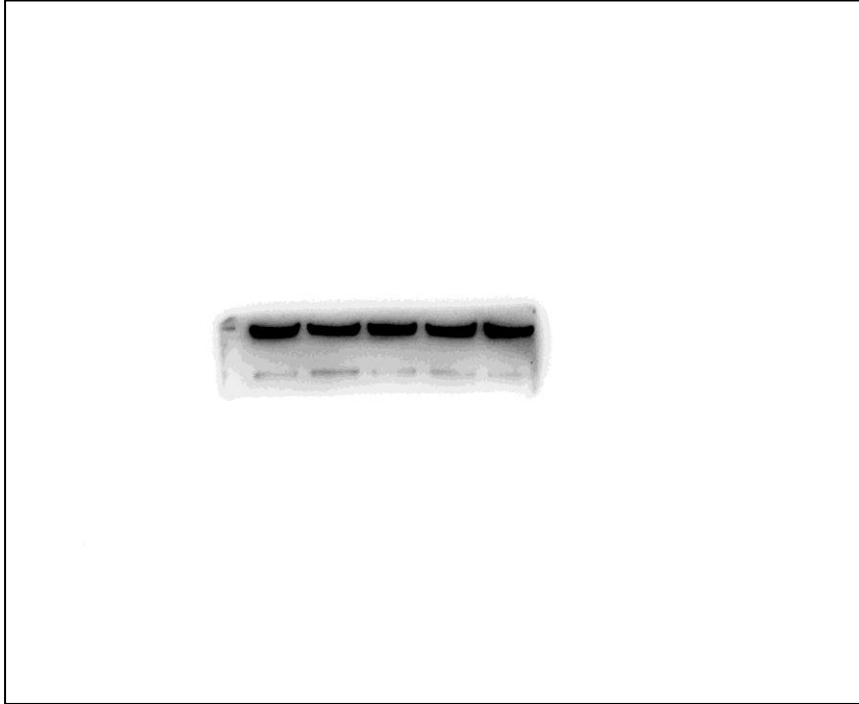

186

187 Fig 6M ZO-1

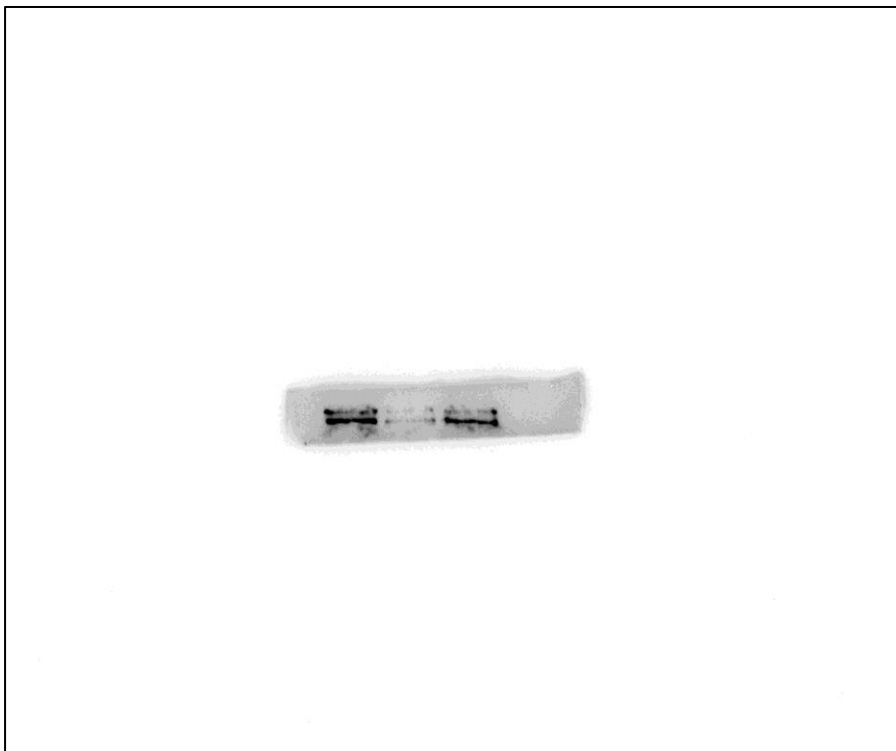

188

189 Fig 6M Occludin

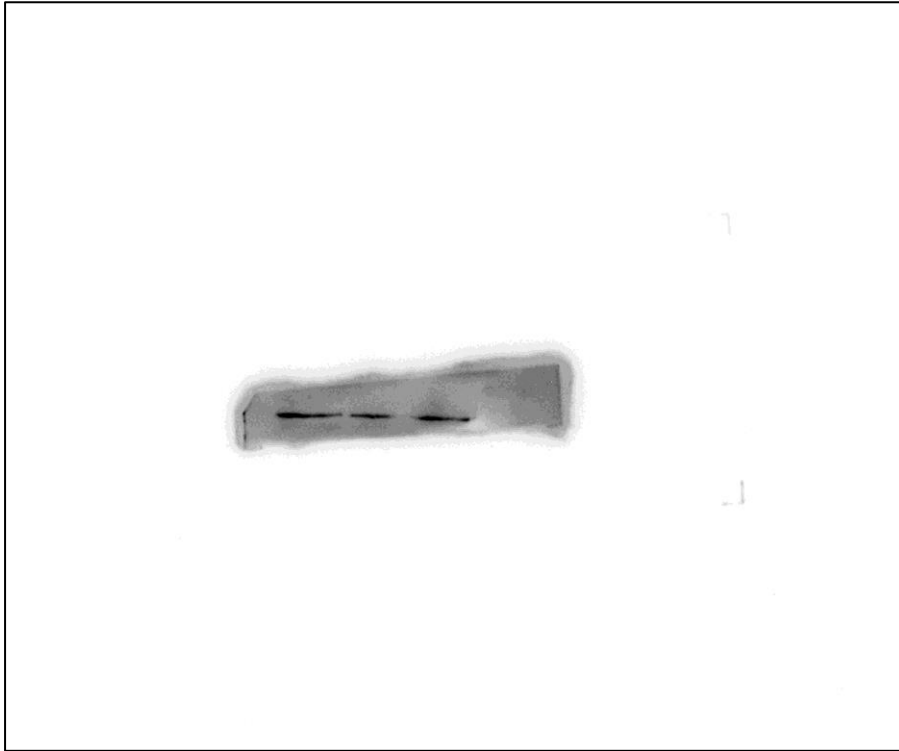

190

191 Fig 6M Claudin-3

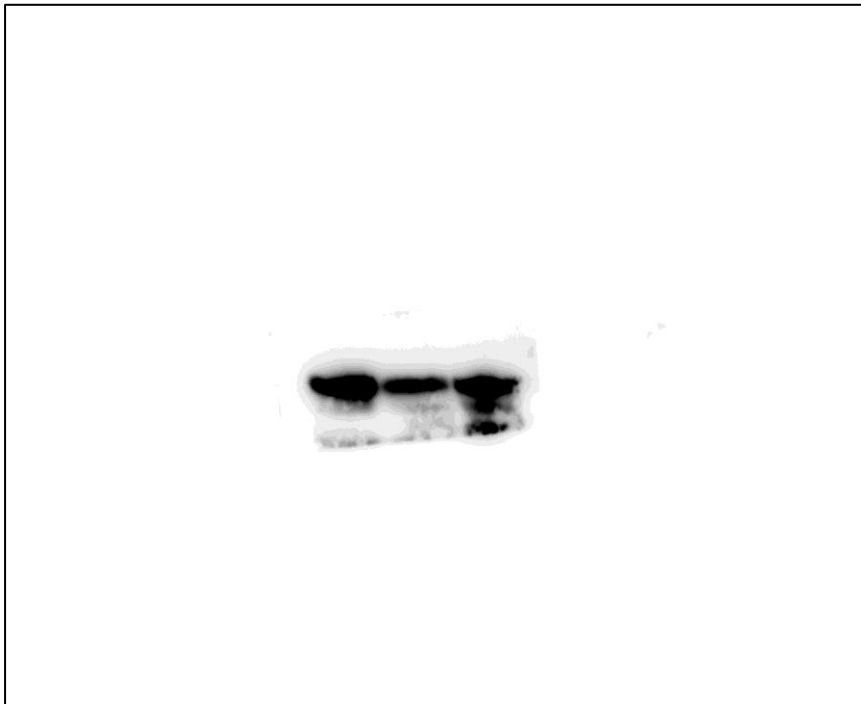

192

193 Fig 6M actin

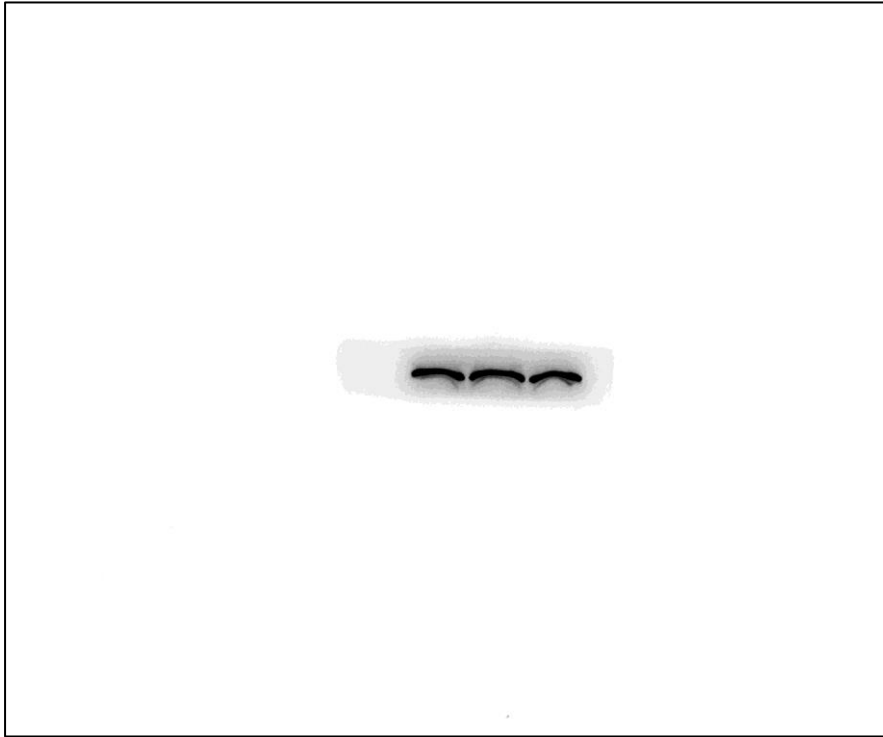

194

195

Fig 6Q p-p65

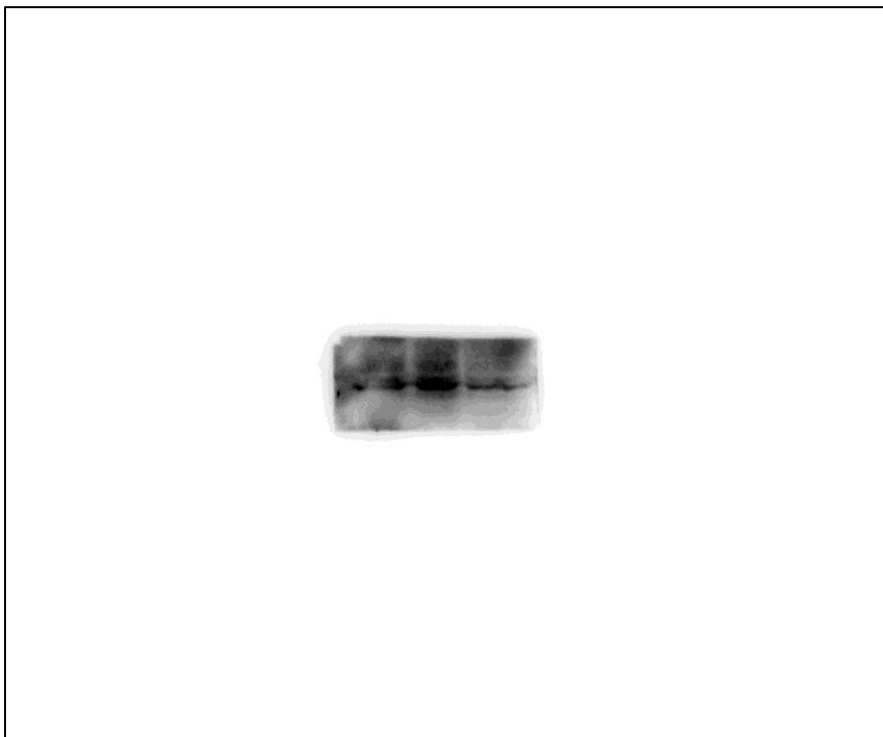

196

197

Fig 6Q p65

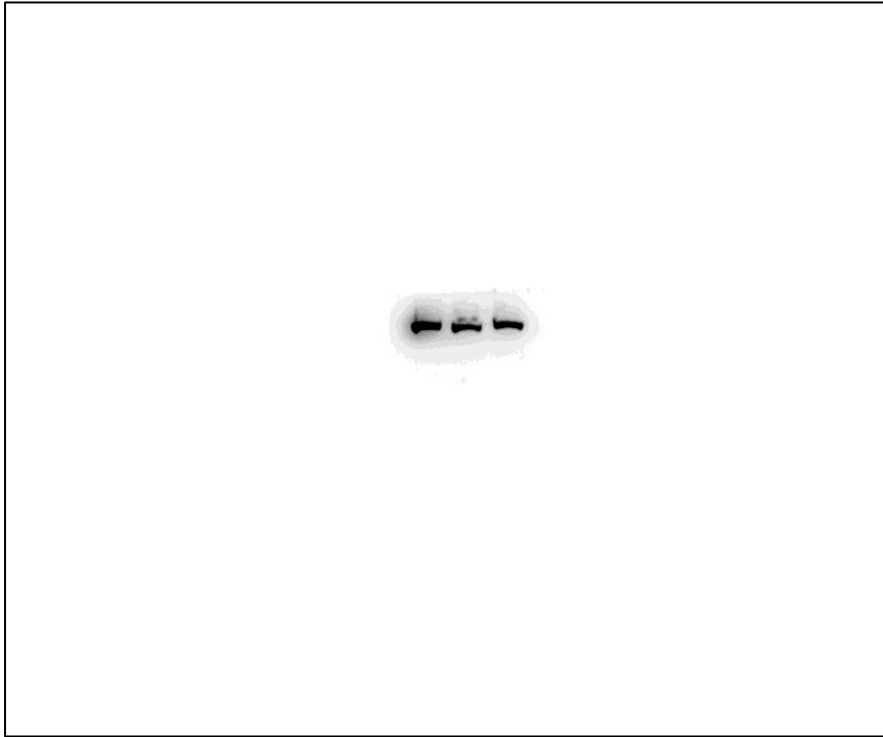

198

199

Fig 6Q NLRP3

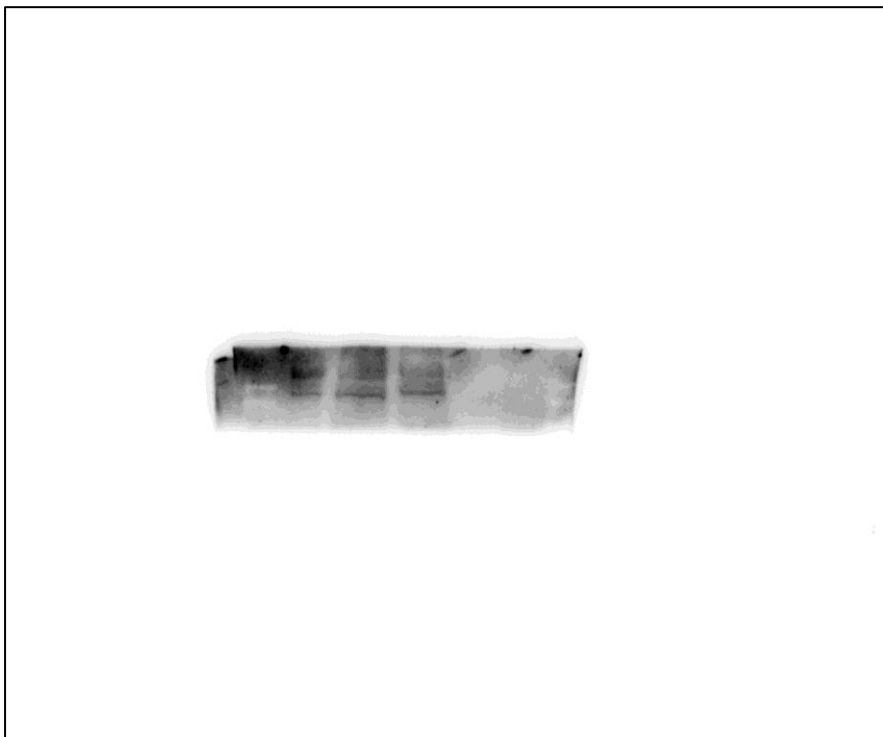

200

201

Fig 6Q ASC

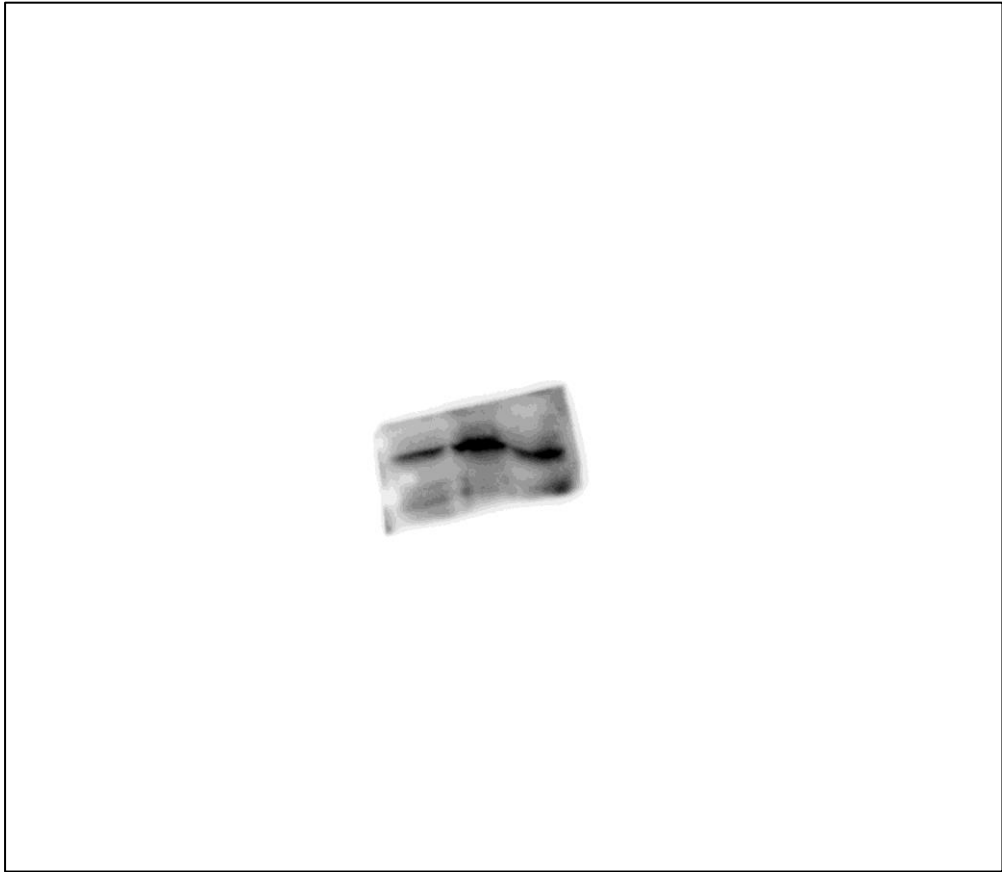

202

203 Fig 6Q IL-1 $\beta$

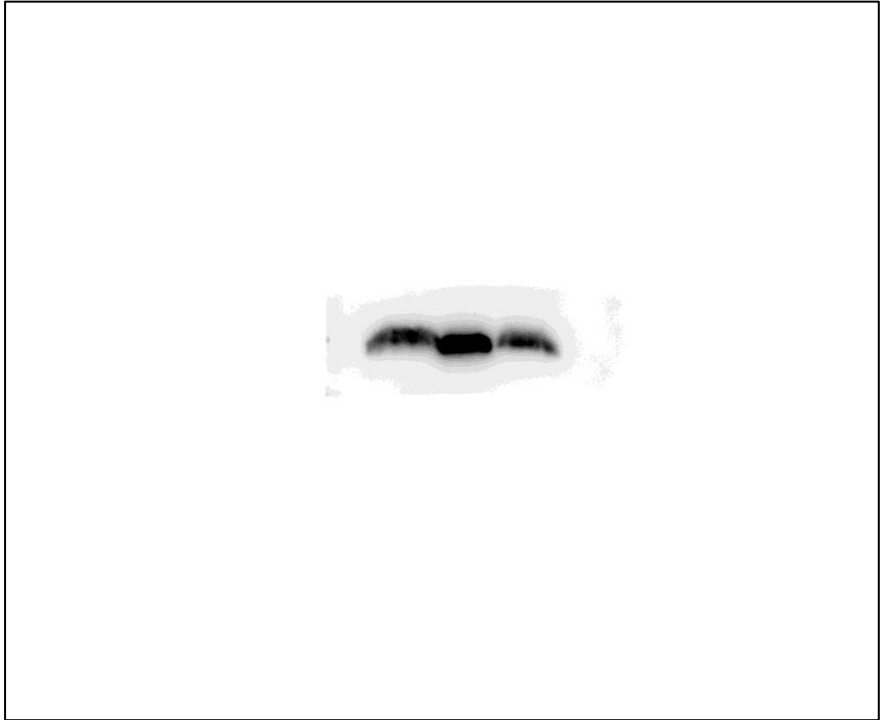

204

205 Fig 6Q actin

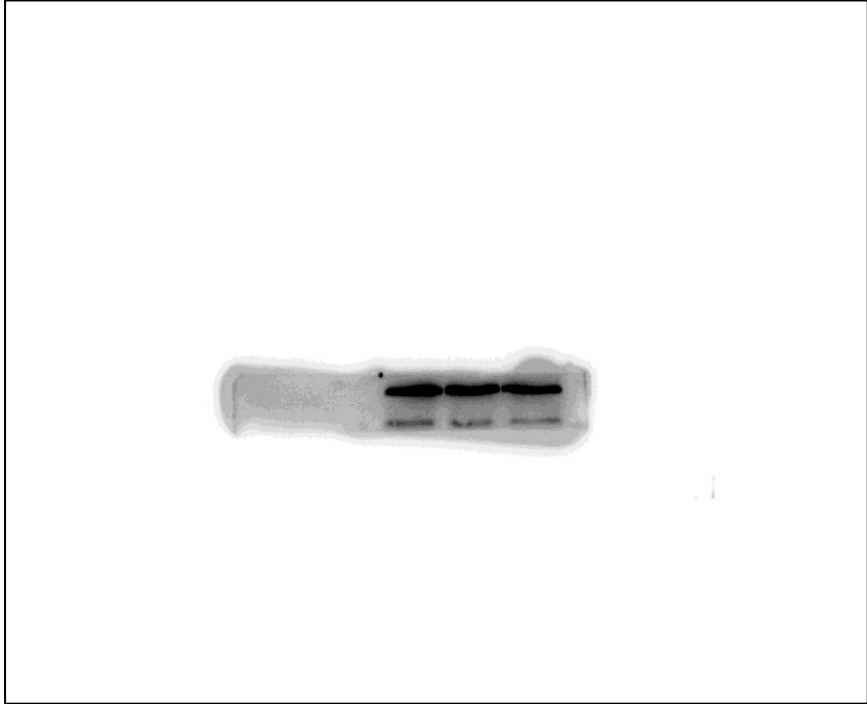

206

207 Fig 7I ZO-1

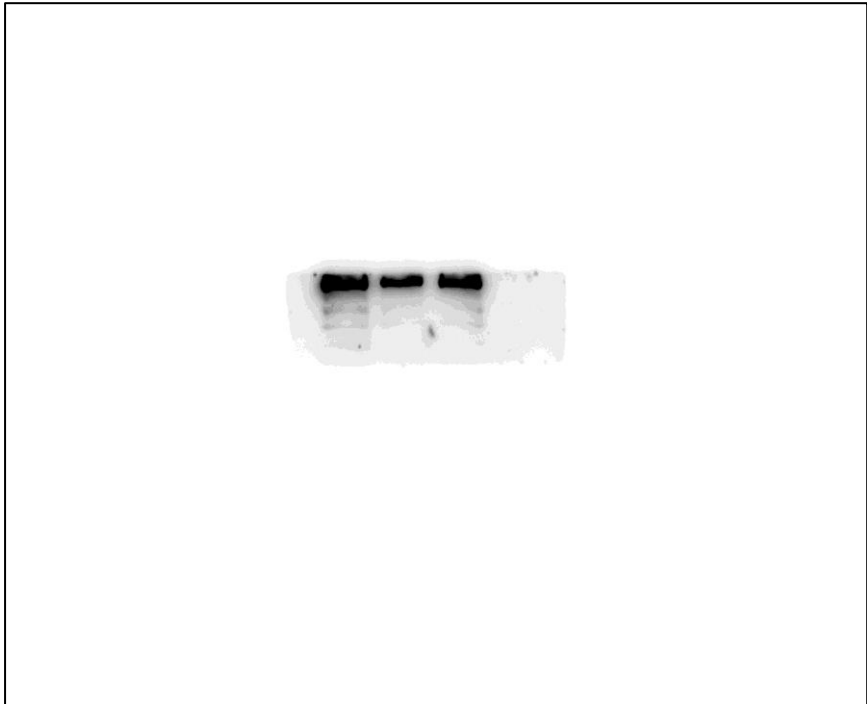

208

209 Fig 7I Occludin

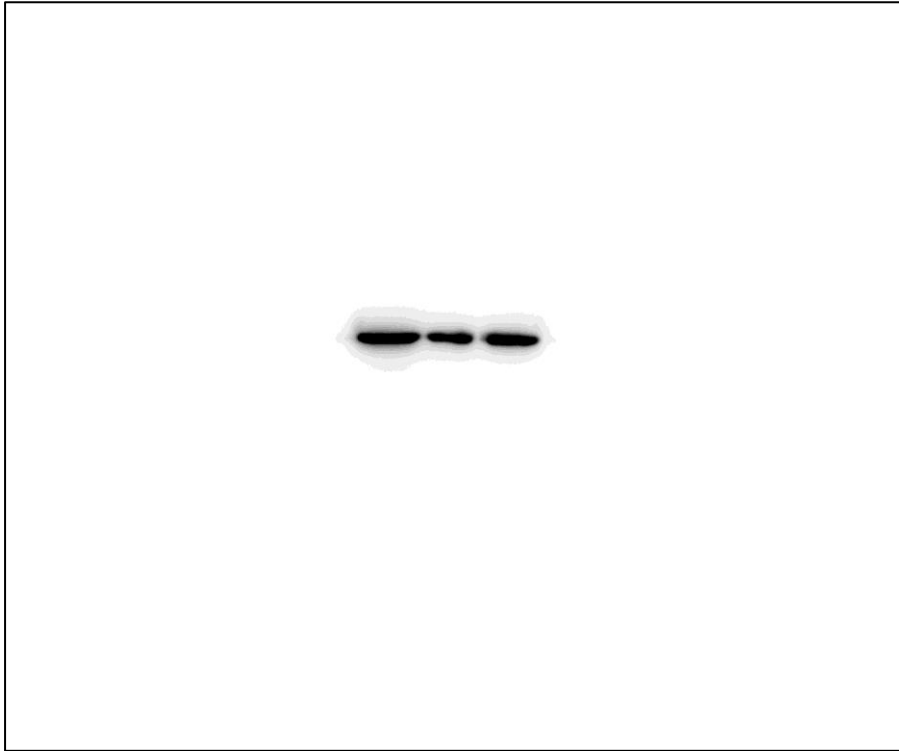

210

211 Fig 7I Claudin-3

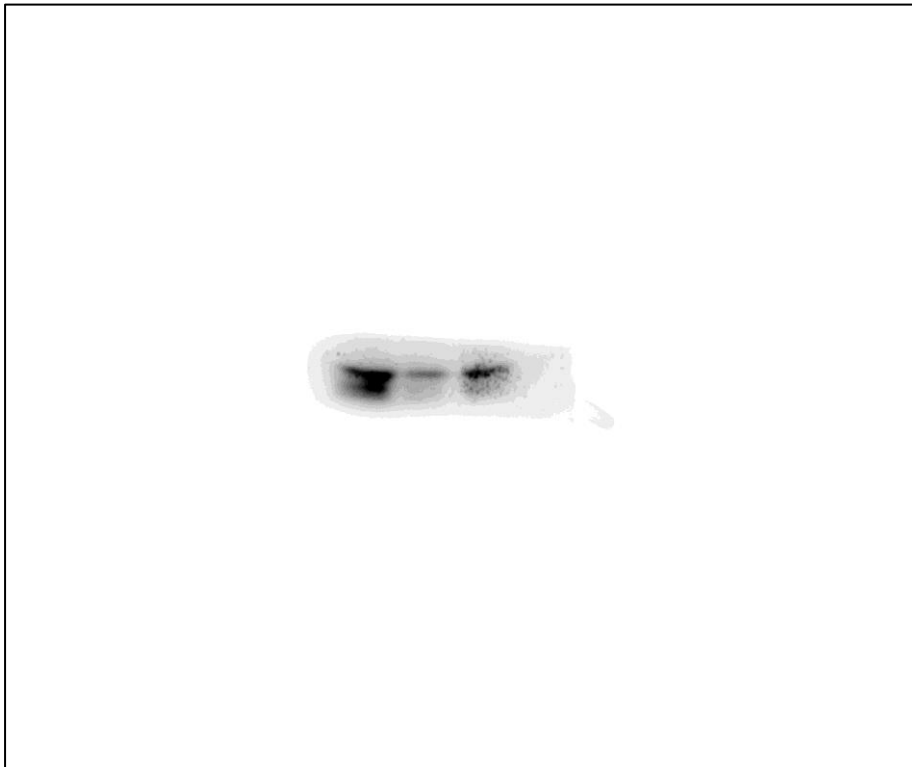

212

213 Fig 7I actin



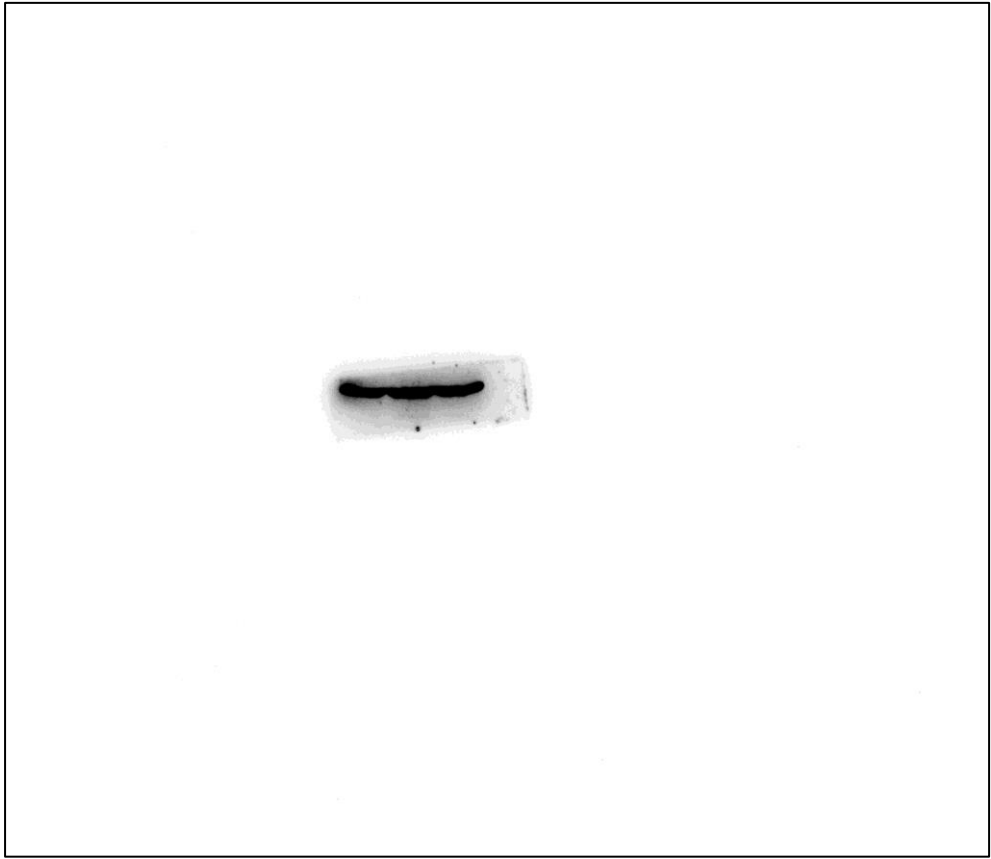

214

215 Fig 7M p-p65

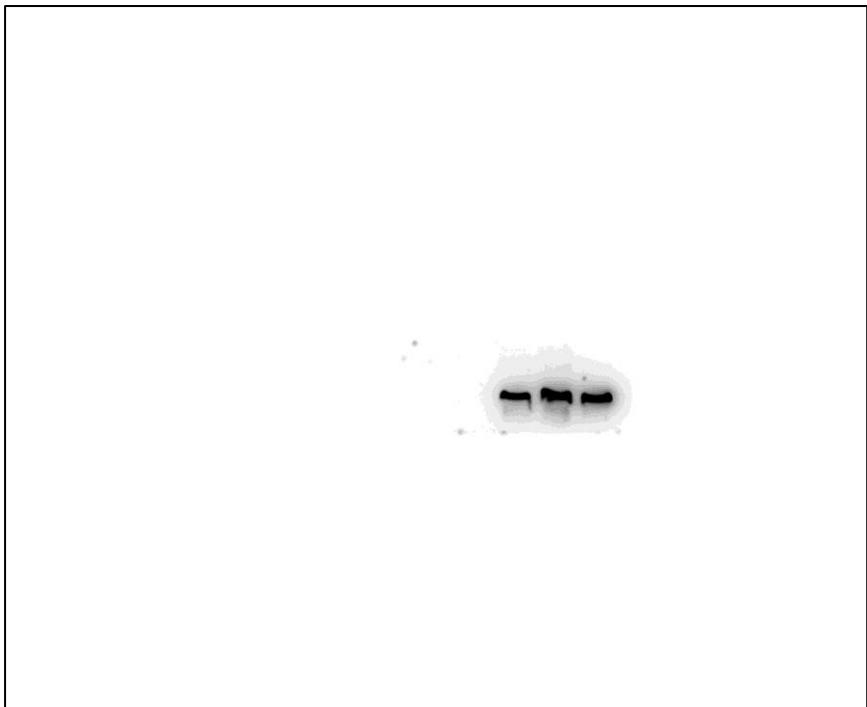

216

217 Fig 7M p65

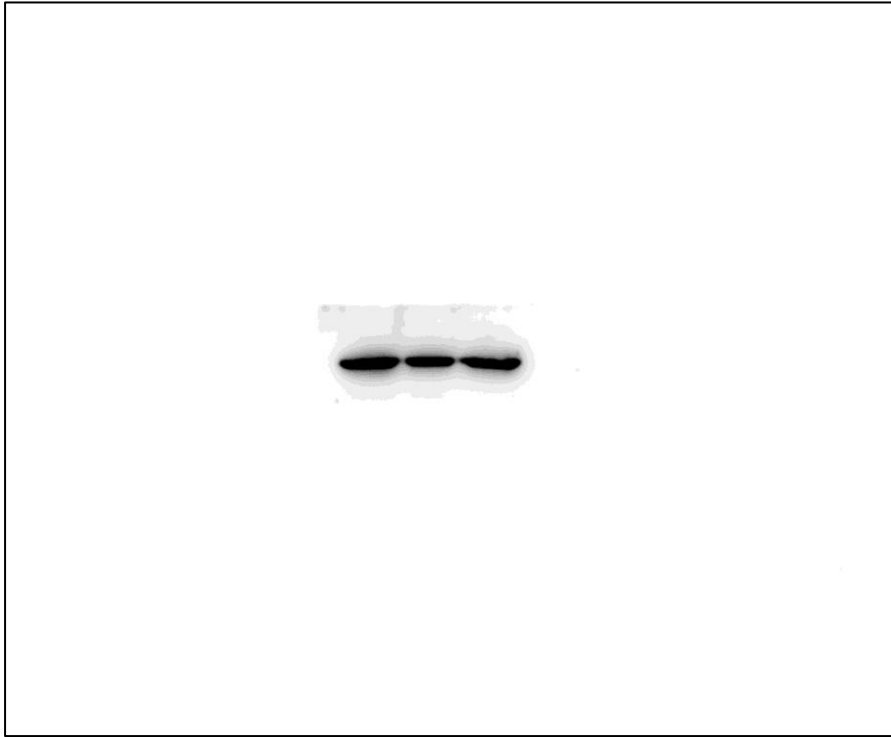

218

219

Fig 7M NLRP3

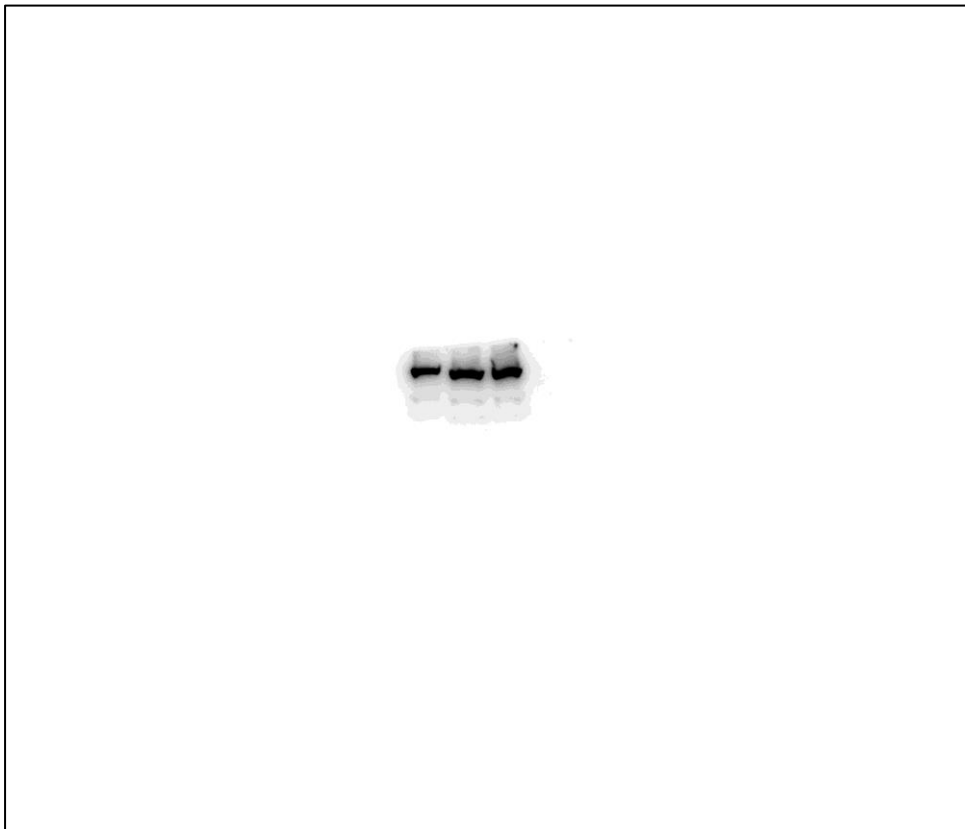

220

221

Fig 7M ASC

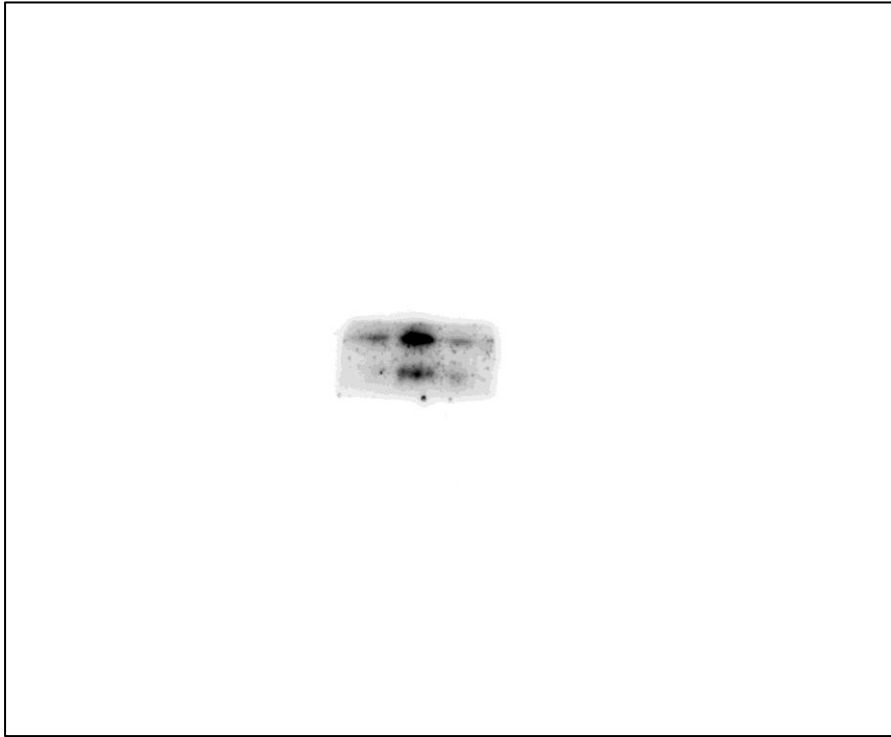

222

223

Fig 7M IL-1 $\beta$

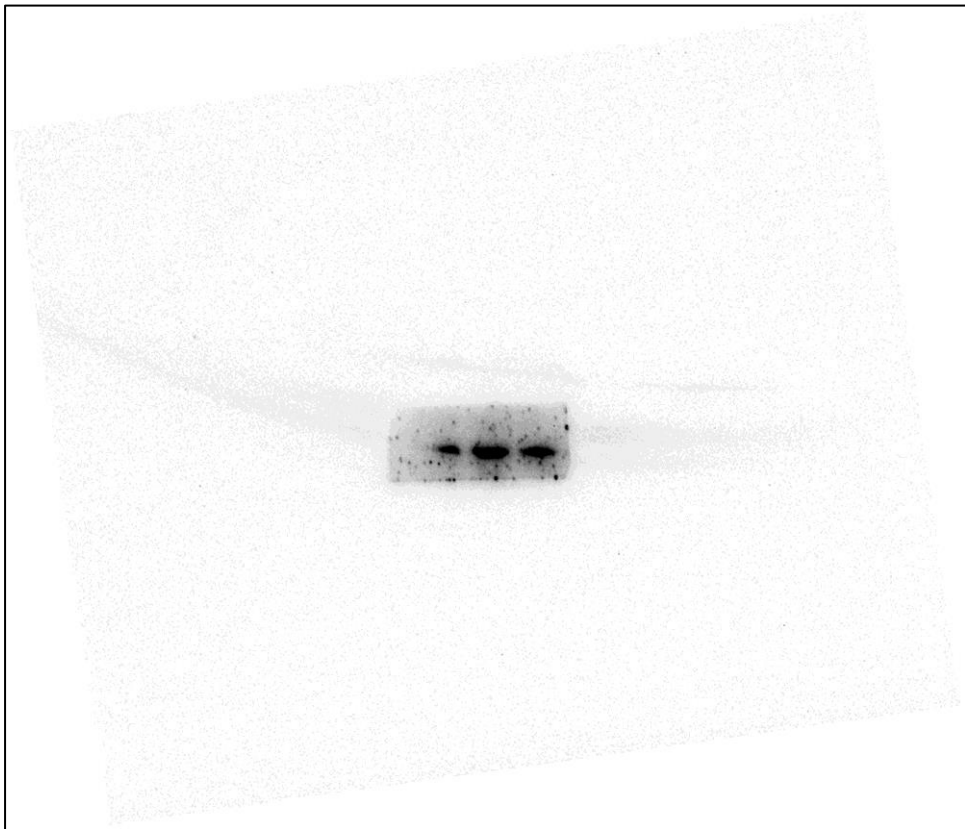

224

225

Fig 7M actin

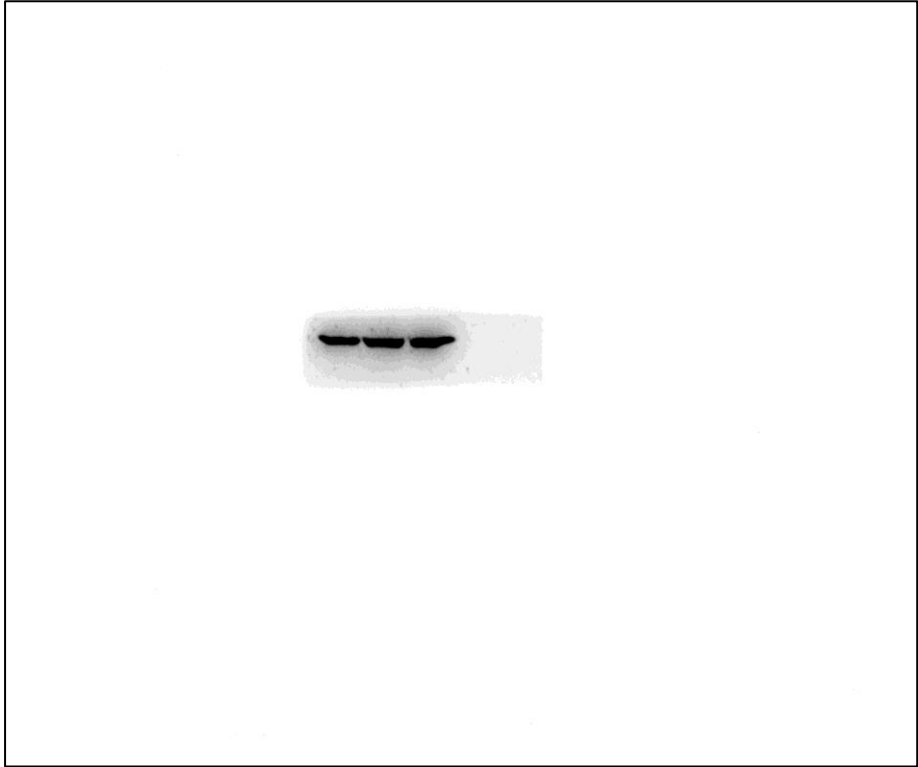

226
